# Supplementary material
Source: PubMed Central journal article supplement (PMC4060935)
Supplement: ml400470s_si_001.pdf [file ml400470s_si_001.pdf]

# Supporting Information for

## Potent and Orally Efficacious Bisthiazole-Based Histone Deacetylase Inhibitors

*Fei Chen, Hui Chai, Mingbo Su, Yangming Zhang, Jia Li<sup>\*</sup>, XinXie<sup>\*</sup>, Fajun Nan<sup>\*</sup>*

*Chinese National Center for Drug Screening, State Key Laboratory of Drug Research,  
Shanghai Institute of MateriaMedica, 189 Guoshoujing Road, Shanghai, 201203,  
China*

To whom correspondence should be addressed:

E-mail: [fjnan@mail.shcnc.ac.cn](mailto:fjnan@mail.shcnc.ac.cn), [xxie@mail.shcnc.ac.cn](mailto:xxie@mail.shcnc.ac.cn), [jli@mail.shcnc.ac.cn](mailto:jli@mail.shcnc.ac.cn)

| <b>Contents</b>                                                                                              | <b>Page<br/>Number</b> |
|--------------------------------------------------------------------------------------------------------------|------------------------|
| 1. Table S1. Inhibitory activity of <b>8f</b> against Human HDACs                                            | S2                     |
| 2. Table S2. Pharmacokinetics of compound <b>8f</b> in mice                                                  | S2                     |
| 3. Table S3. Clinical scores of EAE treated with <b>8f</b> or PBS<br>following different treatment protocols | S2                     |
| 4. Figure S1. <b>8f</b> treatment reduces CNS infiltration of pathogenic<br>T cells                          | S3                     |
| 5. Experimental Section                                                                                      | S4                     |
| 6. Biological Assays                                                                                         | S25                    |

**Table S1.** Inhibitory activity of compound **8f** against Human HDACs

| Compd     | IC <sub>50</sub> ( $\mu$ M) <sup>a</sup> |            |            |            |            |            |            |            |            |
|-----------|------------------------------------------|------------|------------|------------|------------|------------|------------|------------|------------|
|           | HDAC1                                    | HDAC2      | HDAC3      | HDAC4      | HDAC5      | HDAC6      | HDAC8      | HDAC10     | HDAC11     |
| <b>8f</b> | 0.07                                     | 0.03       | 0.26       | 0.10       | 0.08       | 0.79       | 0.56       | 0.37       | 0.40       |
|           | $\pm 0.01$                               | $\pm 0.00$ | $\pm 0.05$ | $\pm 0.01$ | $\pm 0.01$ | $\pm 0.14$ | $\pm 0.05$ | $\pm 0.02$ | $\pm 0.09$ |

<sup>a</sup> Values are expressed as the mean  $\pm$  SD and the test was performed in triplicate.

**Table S2.** Pharmacokinetics of compound **8f** in mice<sup>a</sup>

| Route of Administration | Tissue | T <sub>max</sub><br>h | C <sub>max</sub><br>ng/ml(g) | AUC <sub>0-t</sub><br>ng.h/ml(g) | AUC <sub>0-∞</sub><br>ng.h/ml(g) | MRT<br>h | t <sub>1/2</sub><br>h | CLz<br>L/h/kg | Vz<br>L/kg |
|-------------------------|--------|-----------------------|------------------------------|----------------------------------|----------------------------------|----------|-----------------------|---------------|------------|
| i.g.                    | Plasma | 0.083                 | 7043                         | 12070                            | 12088                            | 1.76     | 1.13                  | /             | /          |
|                         | Brain  | 0.25                  | 158                          | 226                              | 229                              | 1.65     | 1.22                  | /             | /          |
| i.v.                    | Plasma | 0.083                 | 7179                         | 5083                             | 5085                             | 0.85     | 0.92                  | 1.97          | 1.67       |
|                         | Brain  | 0.083                 | 348                          | 149                              | 153                              | 0.63     | 0.98                  | /             | /          |

<sup>a</sup>54 male KM mouse, 18–20g. **8f** was dissolved in 5% DMSO/1% Cremophor EL/94% saline for i.v. injection (10mg/kg) and in 2% DMSO/1% Cremophor EL/97% 0.5% CMC-Na for i.g. administration (20mg/kg).

**Table S3.** Clinical scores of EAE mice treated with **8f** or PBS following different treatment protocols<sup>a</sup>

|                                                    | Incidence | Onset of EAE (Days after Immunization) | Maximum Score    | Cumulative Score  |
|----------------------------------------------------|-----------|----------------------------------------|------------------|-------------------|
| Control                                            | 8 of 10   | 14.6 $\pm$ 0.56 (n=8)                  | 1.8 $\pm$ 0.35   | 12.2 $\pm$ 2.58   |
| <b>8f</b> (10mg/kg oral b.i.d, starts from day 3)  | 2 of 10   | 15.5 $\pm$ 1.5 (n=2)                   | 0.3 $\pm$ 0.2 ** | 1.6 $\pm$ 1.05 ** |
| Control                                            | 8 of 10   | 13.5 $\pm$ 0.38 (n=8)                  | 1.75 $\pm$ 0.31  | 16.4 $\pm$ 3.40   |
| <b>8f</b> (10mg/kg oral b.i.d, starts from day 15) | 6 of 10   | 13.8 $\pm$ 0.31 (n=6)                  | 1.1 $\pm$ 0.33 * | 8.7 $\pm$ 3.00 *  |

<sup>a</sup>This table summarizes the results of two experiments with EAE mice treated with **8f**. Data represent mean  $\pm$  SEM of the total mice in each group (n=10). From the time of EAE onset, only the mice with EAE were included in calculations. \*p<0.05, \*\*p<0.01 versus control group (Mann-Whitney Rank sum test).

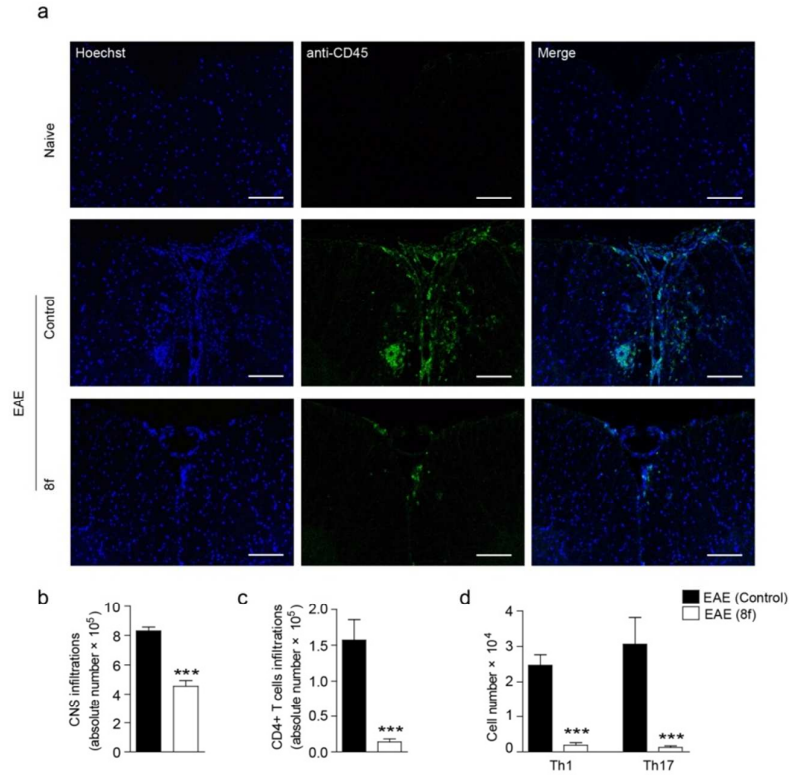

**Figure S1.8f** treatment reduces CNS infiltration of pathogenic T cells.

**(a)** Immunofluorescent staining of CD45<sup>+</sup> leukocytes in frozen sections of spinal cords isolated from naive, vehicle, or **8f**-treated EAE mice. The nuclei were stained with Hoechst33342. **(b-d)** Total CNS infiltrations were isolated by Percoll gradient centrifugation from vehicle or **8f**-treated EAE mice. Cells were analyzed by flow cytometry. The number of total infiltrated cells **(b)** CD4<sup>+</sup> T cells **(c)** or Th1 (IFN-g positive) and Th17 (IL-17 positive) cells in the CNS **(d)** are shown. Data are mean  $\pm$  SEM, \*\*\* $p < 0.001$  versus vehicle control (Student's *t*-test).

## Experimental Procedures and Characterization Data

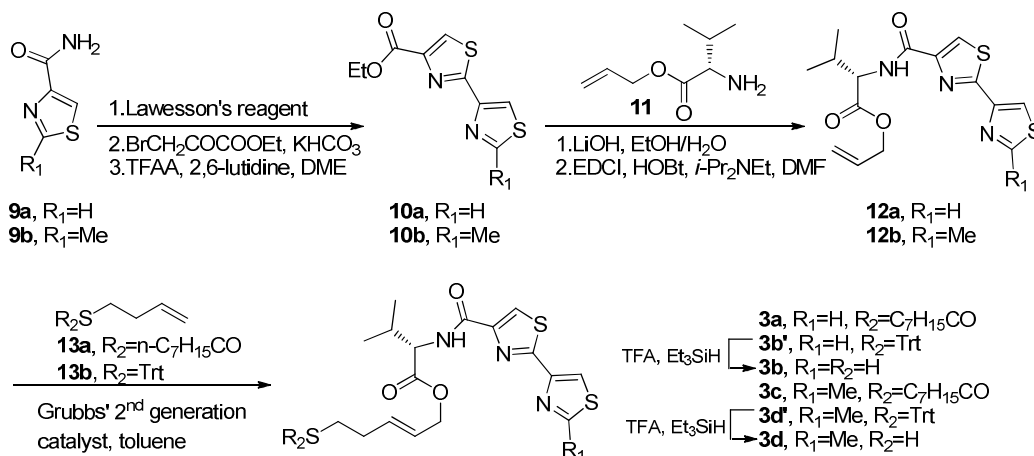

### Preparation procedure for 10a-10b

Lawesson's reagent (1.58g, 3.9mmol) was added to a solution of **9a** (1.0g, 7.8mmol) in dry DME (50mL). The reaction mixture was stirred for 8h at 25°C and then concentrated under reduced pressure. The obtained residue was purified by silica gel column chromatography (petroleum ether/EtOAc, 4/1 to 2/1). The thioamide was obtained as a white solid (1.1g, 97.8%).

To a solution of above thioamide (1.1g, 7.36mmol) in dry DME (40mL) was added  $KHCO_3$  (3.8g, 0.038mol). The reaction mixture was stirred for 10 min at room temperature, and then ethyl bromopyruvate (4.2g, 0.168mol, 80%) was added dropwise. The mixture was cooled to 0°C and a solution of 2,6-lutidine (4.8g, 0.023mol) and trifluoroacetic anhydride (4.1g, 0.038mol) in dry DME (20mL) was added dropwise. The resulting mixture was stirred at 0°C for 40 min, then allowed to warm to room temperature and stirred for 12h, after which the reaction mixture was concentrated under reduced pressure. The obtained residue was dissolved in EtOAc and washed with 1N HCl, saturated  $NaHCO_3$  solution and brine, sequentially. The organic phase was dried over anhydrous  $Na_2SO_4$  and concentrated under reduced pressure. The obtained residue was purified by silica gel column chromatography (petroleum ether/EtOAc, 4/1 to 2/1). Compound **10a** was obtained as a yellow solid (1.66g, 90.7%).  $^1H$  NMR (300MHz,  $CDCl_3$ ):  $\delta$  8.85(s, 1H), 8.23(s, 1H), 8.18(s, 1H), 4.44(q,  $J=7.2$ Hz, 2H), 1.42(t,  $J=7.2$ Hz, 3H). MS (ESI)  $m/z$ : 263.0 ( $M+Na^+$ ).

Following the same procedure, **10b** was obtained as a pale yellow solid (43% over two steps).  $^1H$  NMR (300 MHz,  $CDCl_3$ ):  $\delta$  8.0(s, 1H), 7.84(s, 1H), 4.23(q,  $J=7.2$ Hz, 2H), 2.57(s, 3H), 1.23(t,  $J=7.2$ Hz, 3H).  $^{13}C$  NMR (75 MHz,  $CDCl_3$ ):  $\delta$  167.2, 163.6, 161.6, 147.9, 147.8, 128.0, 117.6, 61.7, 19.2, 14.5. MS (ESI)  $m/z$ : 277.0 ( $M+Na^+$ ).

### Preparation procedure for 12a-12b

LiOH (580mg, 0.013mol) was added to a stirred solution of **10a** (1.66g, 6.9mmol) in EtOH/H<sub>2</sub>O (V/V, 4/1, 50mL) at 0°C. The resulting mixture was stirred for 12h at room temperature, and then most of EtOH was removed under reduced pressure. The aqueous phase was acidified with 1N HCl to pH 2.0 and then extracted with EtOAc. The combined organic phase was washed with brine and dried over anhydrous Na<sub>2</sub>SO<sub>4</sub>. Removal of organic solvent under reduced pressure afforded the acid as a yellow solid (1.39g, 94.8%).

To a solution of above obtained acid (100mg, 0.47mmol) in dry DMF (5mL) was added EDCI (108mg, 0.57mmol), HOBT (76mg, 0.57mmol), **11** (81mg, 0.52mmol) and *i*-Pr<sub>2</sub>NEt (91mg, 0.71mmol), sequentially. The reaction mixture was stirred at room temperature for 12h. Then the mixture was diluted with H<sub>2</sub>O and extracted with EtOAc. The combined organic phase was washed with brine, dried over anhydrous Na<sub>2</sub>SO<sub>4</sub>, and concentrated under reduced pressure. Silica gel column chromatography (petroleum ether/EtOAc, 3/1) of the obtained residue afforded **12a** as a colorless oil (129mg, 77.9%). <sup>1</sup>H NMR (300 MHz, CDCl<sub>3</sub>): δ 8.83(s, 1H), 8.10(s, 1H), 8.05(s, 1H), 7.81(d, *J*=9.0Hz, 1H), 5.87(dddd, *J*=17.1, 10.5, 5.7, 5.1Hz, 1H), 5.31(d, *J*=17.1Hz, 1H), 5.23(d, *J*=10.5Hz, 1H), 4.73(dd, *J*=9.3, 5.1Hz, 1H), 4.65(dd, *J*=17.1, 5.7Hz, 2H), 2.23-2.33(m, 1H), 0.96(t, *J*=6.9Hz, 6H). <sup>13</sup>C NMR (75 MHz, CDCl<sub>3</sub>): δ 171.5, 162.5, 160.9, 153.8, 150.4, 149.5, 131.6, 124.4, 119.0, 116.8, 65.9, 57.3, 31.7, 19.2, 18.0. MS (ESI) *m/z*: 352.1 (M+H<sup>+</sup>).

Following the same procedure, **12b** was obtained as a colorless oil (61% over two steps). <sup>1</sup>H NMR (300 MHz, CDCl<sub>3</sub>): δ 8.10(s, 1H), 7.81(s, 1H), 7.72(d, *J*=10.8Hz, 1H), 5.86(ddd, *J*=17.1, 10.5, 7.2, 5.4Hz, 1H), 5.29(d, *J*=17.1Hz, 1H), 5.19(d, *J*=10.5Hz, 1H), 4.68(dd, *J*=9.0, 7.2Hz, 1H), 4.61(dd, *J*=17.1, 5.4Hz, 2H), 2.68(s, 3H), 2.20-2.31(m, 1H), 0.96(t, *J*=6.9Hz, 6H). <sup>13</sup>C NMR (75 MHz, CDCl<sub>3</sub>): δ 171.0, 166.5, 162.2, 160.5, 149.8, 147.6, 131.2, 123.5, 118.5, 116.1, 65.4, 56.7, 31.2, 18.7, 17.5, 17.5. MS (ESI) *m/z*: 366.1 (M+H<sup>+</sup>).

### Preparation procedure for compound 3a-3d

To a solution of **12a** (55mg, 0.16mmol) in dry toluene (5.0mL) was added thioester **13a** (100mg, 0.48mmol in toluene, 0.48M) and Grubbs' 2<sup>nd</sup> generation catalyst (66mg, 0.08mmol in toluene, 0.08M). The resulting mixture was stirred for 8h at 110°C, after which the mixture was cooled to room temperature and concentrated under reduced pressure. The obtained residue was purified by silica gel column chromatography (petroleum ether/EtOAc, 2/1) to afford compound **3a** as a yellow oil (23mg, 50% based on recovered starting material). <sup>1</sup>H NMR (300 MHz, CDCl<sub>3</sub>): δ 8.86(s, 1H), 8.13(s, 1H), 8.11(s, 1H), 7.83(d, *J*=9.0Hz, 1H), 5.74(dt, *J*=15.3, 6.6Hz, 1H), 5.63(dt, *J*=13.2, 6.0Hz, 1H), 4.74(dd, *J*=9.0, 5.4Hz, 1H), 4.66(dd, *J*=15.3, 5.4Hz, 2H), 2.91(t, *J*=7.5Hz, 2H), 2.52(t, *J*=7.5Hz, 2H), 2.35-2.43(m, 2H), 2.22-2.32(m, 1H), 1.60-1.67(m, 2H), 1.19-1.26(m, 8H), 1.04(t, *J*=6.3Hz, 6H), 0.86(t, *J*=6.9Hz, 3H). <sup>13</sup>C NMR (75 MHz, CDCl<sub>3</sub>): δ 199.5, 171.8, 162.7, 161.0, 153.8, 150.7, 149.8, 134.2, 125.6, 124.4, 116.9, 65.7, 57.4, 44.3, 32.5, 31.9, 31.8, 29.1, 28.1, 25.9, 22.8, 19.3, 18.2, 18.2, 14.2. HRMS (ESI) (*m/z*): Calcd for C<sub>25</sub>H<sub>35</sub>N<sub>3</sub>O<sub>4</sub>S<sub>3</sub>Na<sup>+</sup>, 560.1682 (M+Na<sup>+</sup>), Found 560.1693.

Following the same procedure as for **3a**, **3c** was obtained as a yellow oil (74% based on recovered starting material). <sup>1</sup>H NMR (300 MHz, CDCl<sub>3</sub>): δ 8.10 (s, 1H), 7.89 (s, 1H), 7.82 (d, *J*=9.0 Hz, 1H), 5.75 (ddd, *J*=15.3, 6.6, 6.6 Hz, 1H), 5.67 (ddd, *J*=14.4, 7.2, 7.2 Hz, 1H), 4.74 (dd, *J*=9.0, 5.1 Hz, 1H), 4.61 (dd, *J*=15.3, 4.5 Hz, 2H), 2.90 (t, *J*=7.2 Hz, 2H), 2.77 (s, 3H), 2.51 (t, *J*=7.2 Hz, 2H), 2.31-2.36 (m, 2H), 2.27-2.30 (m, 1H), 1.61-1.66 (m, 2H), 1.19-1.27 (m, 8H), 1.02 (t, *J*=6.6 Hz, 6H), 0.86 (t, *J*=7.2 Hz, 3H). <sup>13</sup>C NMR (75 MHz, CDCl<sub>3</sub>): δ 199.5, 171.8, 167.2, 162.8, 161.1, 150.5, 148.4, 134.1, 125.6, 124.1, 116.7, 65.7, 57.4, 44.3, 32.5, 31.9, 31.8, 29.1, 28.1, 25.9, 22.8, 19.4, 19.3, 18.2, 18.2, 14.2. HRMS (ESI) (*m/z*): Calcd for C<sub>26</sub>H<sub>37</sub>N<sub>3</sub>O<sub>4</sub>S<sub>3</sub>Na<sup>+</sup>, 574.1838 (M+Na<sup>+</sup>), Found 560.1857.

Following the same procedure as for **3a**, intermediate **3b'** was obtained as a yellow oil (46 mg, 51% based on recovered starting material). <sup>1</sup>H NMR (300 MHz, CDCl<sub>3</sub>): δ 8.86 (s, 1H), 8.13 (s, 1H), 8.09 (s, 1H), 7.83 (d, *J*=9.0 Hz, 1H), 7.39-7.48 (m, 6H), 7.32-7.38 (m, 6H), 7.17-7.29 (m, 3H), 5.65 (dt, *J*=15.3, 6.6 Hz, 1H), 5.51 (dt, *J*=15.3, 6.3 Hz, 1H), 4.74 (dd, *J*=9.3, 5.1 Hz, 1H), 4.58 (dd, *J*=12.6, 6.3 Hz, 2H), 2.21-2.33 (m, 1H), 2.10-2.19 (m, 2H), 2.07 (t, *J*=6.9 Hz, 2H), 1.00 (t, *J*=6.9 Hz, 6H). <sup>13</sup>C NMR (75 MHz, CDCl<sub>3</sub>): δ 171.8, 162.6, 161.0, 153.9, 150.6, 149.7, 145.0, 134.8, 129.7, 128.0, 126.8, 124.9, 124.4, 116.9, 66.8, 65.8, 57.3, 31.9, 31.6, 31.4, 19.3, 18.1. MS (ESI) *m/z*: 676.2 (M+Na<sup>+</sup>).

To a solution of above obtained S-tritylanalogue **3b'** (22 mg, 0.034 mmol) in CH<sub>2</sub>Cl<sub>2</sub> (5 mL) Et<sub>3</sub>SiH (13 mg, 0.11 mmol) and TFA (384 mg, 3.4 mmol) were added. The resulting mixture was stirred at room temperature for 2 h. Then the reaction mixture was concentrated under reduced pressure and the obtained residue was purified by silica gel column chromatography (petroleum ether/EtOAc, 4/1) to afford **3b** as a pale yellow oil (8 mg, 57.1%). <sup>1</sup>H NMR (300 MHz, CDCl<sub>3</sub>): δ 8.87 (s, 1H), 8.14 (s, 1H), 8.09 (s, 1H), 7.84 (d, *J*=9.0 Hz, 1H), 5.78 (dt, *J*=15.3, 6.6 Hz, 1H), 5.68 (dt, *J*=12.3, 6.3 Hz, 1H), 4.76 (dd, *J*=8.7, 4.8 Hz, 1H), 4.65 (dd, *J*=15.3, 5.4 Hz, 2H), 2.58 (q, *J*=7.5 Hz, 2H), 2.39-2.44 (m, 2H), 2.31-2.37 (m, 1H), 1.04 (d, *J*=6.3 Hz, 6H). <sup>13</sup>C NMR (75 MHz, CDCl<sub>3</sub>): δ 171.9, 162.7, 161.1, 153.9, 150.6, 149.8, 134.0, 125.9, 124.5, 117.0, 65.7, 57.4, 36.6, 31.9, 24.1, 19.4, 18.2. HRMS (ESI) (*m/z*): Calcd for C<sub>17</sub>H<sub>21</sub>N<sub>3</sub>O<sub>3</sub>S<sub>3</sub>Na<sup>+</sup>, 434.0637 (M+Na<sup>+</sup>), Found 434.0748.

Following the same procedure as for **3a**, intermediate **3d'** was obtained as a yellow oil (26 mg, 37.7% based on recovered starting material). <sup>1</sup>H NMR (300 MHz, CDCl<sub>3</sub>): δ 8.09 (s, 1H), 7.87 (s, 1H), 7.83 (d, *J*=9.0 Hz, 1H), 7.39-7.53 (m, 6H), 7.30-7.36 (m, 6H), 7.20-7.27 (m, 3H), 5.66 (dt, *J*=15.3, 6.3 Hz, 1H), 5.50 (dt, *J*=15.6, 6.3 Hz, 1H), 4.73 (dd, *J*=9.3, 5.1 Hz, 1H), 4.60 (dd, *J*=10.8, 5.4 Hz, 2H), 2.70 (s, 3H), 2.26-2.37 (m, 1H), 2.16-2.24 (m, 2H), 2.10 (t, *J*=6.9 Hz, 2H), 0.99 (t, *J*=6.9 Hz, 6H). <sup>13</sup>C NMR (75 MHz, CDCl<sub>3</sub>): δ 171.8, 167.1, 162.8, 161.1, 150.5, 148.4, 145.1, 134.8, 129.8, 128.0, 126.8, 125.0, 124.1, 116.7, 66.8, 65.8, 57.3, 31.9, 31.6, 31.4, 19.4, 19.3, 18.1. MS (ESI) *m/z*: 690.2 (M+Na<sup>+</sup>).

Following the same procedure as for **3b**, compound **3d** was obtained as a pale yellow oil (11 mg, 57.9%). <sup>1</sup>H NMR (300 MHz, CDCl<sub>3</sub>): δ 8.11 (s, 1H), 7.89 (s, 1H), 7.86 (d, *J*=6.3 Hz, 1H), 5.77 (ddd, *J*=15.3, 6.3, 6.3 Hz, 1H), 5.65 (ddd, *J*=14.4, 6.6, 6.6 Hz, 1H), 4.74 (dd, *J*=9.0, 4.8 Hz, 1H), 4.64 (dd, *J*=15.3, 6.9 Hz, 2H), 2.77 (s, 3H), 2.57 (q, *J*=7.5 Hz, 2H), 2.36-2.43 (m, 2H), 2.28-2.34 (m, 1H), 1.05 (d, *J*=6.3 Hz, 6H). <sup>13</sup>C NMR (75 MHz,

CDCl<sub>3</sub>):  $\delta$  171.9, 167.2, 162.8, 161.1, 150.4, 148.3, 134.0, 125.9, 124.2, 116.7, 65.7, 57.4, 36.6, 31.8, 24.1, 19.4, 19.3, 18.2. HRMS (ESI) (*m/z*): Calcd for C<sub>18</sub>H<sub>23</sub>N<sub>3</sub>O<sub>3</sub>S<sub>3</sub>Na<sup>+</sup>, 448.0794 (M+Na<sup>+</sup>), Found 448.0859.

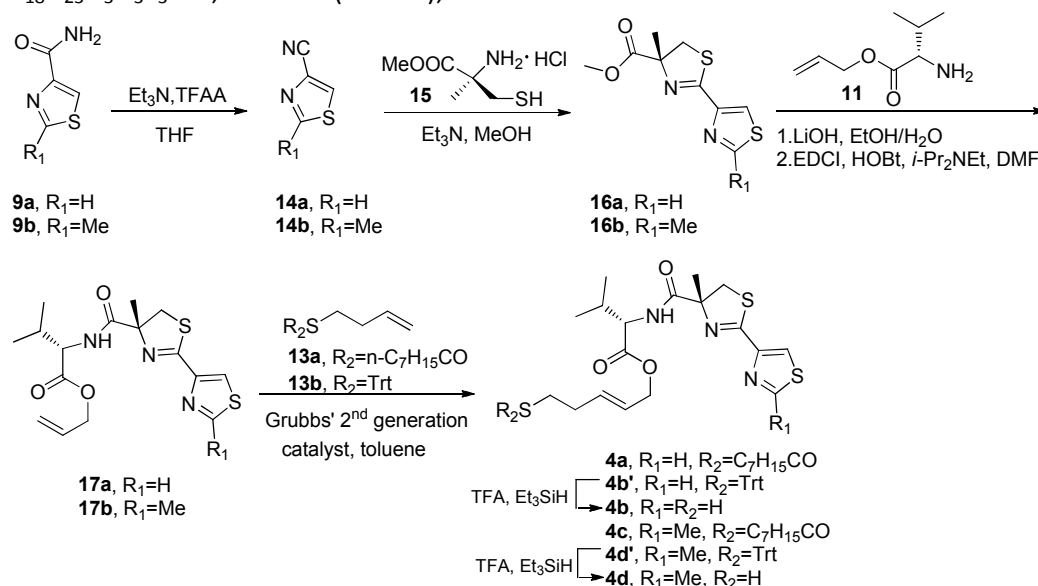

#### Preparation procedure for 14a-14b

Et<sub>3</sub>N (1.04g, 0.010mol) and TFAA (1.08g, 5.15mmol) were added dropwise to a solution of **9a** (600mg, 4.68mmol) in dry THF (10mL, 0.47M) at 0°C. The resulting mixture was stirred for 2h at room temperature, after which the reaction mixture was diluted with H<sub>2</sub>O and extracted with Et<sub>2</sub>O. The organic extracts were washed with 1N HCl, saturated NaHCO<sub>3</sub> and brine, sequentially. The obtained organic phase was dried over anhydrous Na<sub>2</sub>SO<sub>4</sub> and concentrated under reduced pressure. Silica gel column chromatography (petroleum ether/EtOAc, 4/1) of the obtained residue afforded cyanothiazole **14a** as a colorless oil (285mg, 55.2%). <sup>1</sup>H NMR (300 MHz, CDCl<sub>3</sub>):  $\delta$  8.90(s, 1H), 8.12(s, 1H). <sup>13</sup>C NMR (75 MHz, CDCl<sub>3</sub>):  $\delta$  154.9, 130.7, 127.8, 113.9. MS (ESI) *m/z*: 133.0 (M+Na<sup>+</sup>).

Following similar procedure, cyanothiazole **14b** was obtained as a colorless oil (67.4%). <sup>1</sup>H NMR (300 MHz, CDCl<sub>3</sub>):  $\delta$  7.84(s, 1H), 2.60(s, 3H). <sup>13</sup>C NMR (75 MHz, CDCl<sub>3</sub>):  $\delta$  168.3, 131.1, 126.0, 114.3, 19.2. MS (ESI) *m/z*: 147.0 (M+Na<sup>+</sup>).

#### Preparation procedure for 16a-16b

To a solution of cyanothiazole **14a** (50mg, 0.45mmol) in dry MeOH (10mL) was added Et<sub>3</sub>N (138mg, 1.35mmol) and **15** (167mg, 0.90mmol). The resulting mixture was stirred for 48h at 50°C. The reaction mixture was then concentrated under reduced pressure and the residue dissolved in CH<sub>2</sub>Cl<sub>2</sub>. The organic phase was washed with brine, dried over anhydrous Na<sub>2</sub>SO<sub>4</sub>, and concentrated under reduced pressure. The obtained residue was purified by silica gel column chromatography (petroleum ether/EtOAc, 1/1) to afford **16a** as a colorless oil (47mg, 42.7%). <sup>1</sup>H NMR (300 MHz, CDCl<sub>3</sub>):  $\delta$  8.80(s, 1H), 8.09(s, 1H), 3.87(d, *J*=11.7Hz, 1H), 3.77(s, 3H), 3.26(d, *J*=11.1Hz, 1H), 1.62(s, 3H). <sup>13</sup>C NMR (75 MHz, CDCl<sub>3</sub>):  $\delta$  174.2, 163.6, 153.5, 150.3, 121.3, 85.2, 53.5, 41.9, 24.6. MS (ESI) *m/z*: 243.0 (M+H<sup>+</sup>).

Following similar procedure, **16b** was obtained as a colorless oil (36.9%). <sup>1</sup>H NMR (300

MHz, CDCl<sub>3</sub>):  $\delta$  7.81(s, 1H), 3.82(d,  $J=11.7$ Hz, 1H), 3.75(s, 3H), 3.22(d,  $J=11.1$ Hz, 1H), 2.69(s, 3H), 1.59(s, 3H). <sup>13</sup>C NMR(75 MHz, CDCl<sub>3</sub>):  $\delta$  173.9, 166.6, 163.2, 148.6, 121.2, 84.7, 53.1, 41.6, 24.1, 19.4. MS (ESI)  $m/z$ : 279.0 (M+Na<sup>+</sup>).

#### Preparation procedure for 17a-17b

To a stirred solution of **16a**(27mg, 0.11mmol) in THF/H<sub>2</sub>O (4:1, v/v, 10mL) was added NaOH (4mg, 0.11mmol) at 0°C. The resulting mixture was stirred for 4h at room temperature, after which the mixture was acidified with 1M KHSO<sub>4</sub> solution to pH 2.0 and extracted with EtOAc. The combined organic phase was washed with brine, dried over anhydrous Na<sub>2</sub>SO<sub>4</sub> and concentrated under reduced pressure to afford the acid as a colorless oil (25mg, 98.4%).

To a solution of the above obtained acid (25mg, 0.11mmol) in dry DMF (2mL) was added EDCI (42mg, 0.22mmol), HOBT (30mg, 0.22mmol), **11** (26mg, 0.17mmol) and *i*-Pr<sub>2</sub>NEt (43mg, 0.33mmol), sequentially. The resulting mixture was stirred for 12h at room temperature. Then the mixture was diluted with H<sub>2</sub>O and extracted with EtOAc. The combined organic phase was washed with brine, dried over anhydrous Na<sub>2</sub>SO<sub>4</sub> and concentrated under reduced pressure. Silica gel column chromatography (petroleum ether/EtOAc, 2/1) of the obtained residue afforded **17a** as a colorless oil (40mg, 99.1%). <sup>1</sup>H NMR(300 MHz, CDCl<sub>3</sub>):  $\delta$  8.87(s, 1H), 8.12(s, 1H), 7.25(d,  $J=9.0$ Hz, 1H), 5.92(dddd,  $J=17.1, 10.5, 7.2, 5.7$ Hz, 1H), 5.37(d,  $J=17.1$ Hz, 1H), 5.27(d,  $J=10.5$ Hz, 1H), 4.67(dd,  $J=11.7, 5.7$ Hz, 1H), 4.63(dd,  $J=13.2, 7.2$ Hz, 1H), 4.56(dd,  $J=9.0, 5.1$ Hz, 1H), 3.82(d,  $J=11.7$ Hz, 1H), 3.38(d,  $J=11.7$ Hz, 1H), 2.15-2.24(m, 1H), 1.63(s, 3H), 0.87(d,  $J=6.9$ Hz, 3H), 0.86(d,  $J=6.9$ Hz, 3H). <sup>13</sup>C NMR(75 MHz, CDCl<sub>3</sub>):  $\delta$  175.1, 171.8, 164.0, 153.8, 150.5, 132.2, 121.2, 119.5, 85.8, 66.3, 57.6, 42.0, 31.7, 25.3, 19.6, 18.2. MS (ESI)  $m/z$ : 368.1 (M+H<sup>+</sup>).

Following similar procedure, **17b** was obtained as a colorless oil (65.5% over two steps). <sup>1</sup>H NMR(300 MHz, CDCl<sub>3</sub>):  $\delta$  7.84(s, 1H), 7.20(d,  $J=9.0$ Hz, 1H), 5.90(dddd,  $J=17.1, 10.5, 6.9, 5.4$ Hz, 1H), 5.32(d,  $J=17.1$ Hz, 1H), 5.22(d,  $J=10.5$ Hz, 1H), 4.62(dd,  $J=11.1, 5.7$ Hz, 1H), 4.53(dd,  $J=15.0, 6.9$ Hz, 1H), 4.31(dd,  $J=9.0, 5.1$ Hz, 1H), 3.77(d,  $J=11.1$ Hz, 1H), 3.31(d,  $J=11.4$ Hz, 1H), 2.72(s, 3H), 2.15-2.20(m, 1H), 1.59(s, 3H), 0.87(d,  $J=6.9$ Hz, 3H), 0.83(d,  $J=6.9$ Hz, 3H). <sup>13</sup>C NMR(75 MHz, CDCl<sub>3</sub>):  $\delta$  174.8, 171.4, 166.8, 163.6, 148.8, 131.8, 120.9, 119.0, 85.3, 65.9, 57.2, 41.6, 31.3, 24.9, 19.4, 19.2, 17.8. MS (ESI)  $m/z$ : 382.1 (M+H<sup>+</sup>).

#### Preparation procedure for compound 4a-4d

To a solution of **17a** (35mg, 0.04mmol) in dry toluene (1.0mL) were added thioester **13a** (87mg, 0.40mmol in toluene, 0.40M) and Grubbs' 2<sup>nd</sup> generation catalyst (35mg, 0.04mmol in toluene, 0.04M). The resulting mixture was stirred for 12h at 110°C. The reaction mixture was then cooled to room temperature and concentrated under reduced pressure. The residue was purified by silica gel column chromatography (petroleum ether/EtOAc, 2/1) to afford compound **4a** as a pale yellow oil (10mg of (*E*)-isomer, 33.3% based on recovered starting material). <sup>1</sup>H NMR(300 MHz, CDCl<sub>3</sub>):  $\delta$  7.84(s, 1H), 7.20(d,  $J=9.3$ Hz, 1H), 5.73-5.80(m, 1H), 5.59-5.68(m, 1H), 4.60(t,  $J=5.7$ Hz, 2H), 4.54(dd,  $J=9.0, 4.8$ Hz, 1H), 3.80(d,  $J=11.7$ Hz, 1H), 3.37(d,  $J=11.7$ Hz, 1H), 2.92(t,  $J=7.2$ Hz, 2H), 2.53(t,  $J=7.5$ Hz, 2H), 2.30-2.37(m, 2H), 2.18-2.28(m, 1H), 1.64-1.83(m, 2H), 1.62(s, 3H), 1.18-1.27(m, 8H), 0.98(t,  $J=6.6$ Hz,



3H), 0.88(d,  $J=6.9\text{Hz}$ , 3H), 0.84(d,  $J=6.9\text{Hz}$ , 3H).  $^{13}\text{C}$  NMR(75 MHz,  $\text{CDCl}_3$ ):  $\delta$  199.6, 174.7, 171.6, 163.6, 153.5, 150.1, 134.1, 125.6, 120.8, 85.4, 65.7, 57.2, 44.4, 41.7, 32.5, 31.8, 31.4, 29.9, 29.1, 28.1, 25.9, 24.9, 22.8, 19.3, 17.9, 14.3. HRMS (ESI) ( $m/z$ ):Calcd for  $\text{C}_{26}\text{H}_{39}\text{N}_3\text{O}_4\text{S}_3\text{Na}^+$ ,576.1995( $\text{M}+\text{Na}^+$ ),Found 576.2034.

Following similar procedure,**4c** was obtained as a paleyellow oil(27.5% based onrecovered starting material).  $^1\text{H}$  NMR(300 MHz,  $\text{CDCl}_3$ ):  $\delta$  7.87(s, 1H), 7.22(d,  $J=9.0\text{Hz}$ , 1H), 5.65-5.74(m, 1H), 5.60-5.65(m, 1H), 4.59(t,  $J=6.3\text{Hz}$ , 2H), 4.53(dd,  $J=9.0,4.8\text{Hz}$ , 1H), 3.79(d,  $J=11.4\text{Hz}$ , 1H), 3.34(d,  $J=11.4\text{Hz}$ , 1H), 2.91(t,  $J=7.5\text{Hz}$ , 2H), 2.76(s, 3H), 2.53(t,  $J=7.5\text{Hz}$ , 2H), 2.32-2.41(m, 2H), 2.09-2.29(m, 1H), 1.64-1.76(m, 2H), 1.61(s, 3H), 1.25-1.37(m, 8H), 0.93(t,  $J=6.6\text{Hz}$ , 3H), 0.88(d,  $J=6.9\text{Hz}$ , 3H), 0.84(d,  $J=6.9\text{Hz}$ , 3H).  $^{13}\text{C}$  NMR(75 MHz,  $\text{CDCl}_3$ ):  $\delta$  199.7, 174.8, 171.5, 166.9, 162.6, 148.8, 134.1, 125.6, 121.0, 85.3, 65.6, 57.2, 44.4, 41.7, 32.5, 31.8, 31.3, 29.9, 29.1, 28.1, 25.9, 24.9, 22.8, 19.5, 19.3, 17.9, 14.3. HRMS (ESI) ( $m/z$ ):Calcd for  $\text{C}_{27}\text{H}_{41}\text{N}_3\text{O}_4\text{S}_3\text{Na}^+$ ,590.2151( $\text{M}+\text{Na}^+$ ),Found 590.2169.

Following the same procedure as for **4a**,S-trityl analogue **4b'** was obtained as a yellow oil (15mg, 41.7% based onrecovered starting material).  $^1\text{H}$  NMR(300 MHz,  $\text{CDCl}_3$ ):  $\delta$  8.82(s, 1H), 8.07(s, 1H), 7.35-7.41(m, 6H), 7.19-7.29(m, 6H), 7.12-7.17(m, 3H), 5.63(dt,  $J=15.3,6.3\text{Hz}$ , 1H), 5.49(dt,  $J=15.3,6.0\text{Hz}$ , 1H), 4.49-4.61(m, 3H), 3.80(d,  $J=11.4\text{Hz}$ , 1H), 3.36(d,  $J=11.7\text{Hz}$ , 1H), 2.16-2.29(m, 3H), 2.10(t,  $J=5.4\text{Hz}$ , 2H), 1.60(s, 3H), 0.86(d,  $J=6.9\text{Hz}$ , 3H), 0.81(d,  $J=6.9\text{Hz}$ , 3H).  $^{13}\text{C}$  NMR(75 MHz,  $\text{CDCl}_3$ ):  $\delta$  175.1, 172.0, 153.8, 150.6, 145.5, 138.5, 135.2, 130.2, 128.5, 127.2, 125.9, 121.2, 85.9, 67.3, 66.1, 57.6, 42.1, 32.0, 31.8, 25.4, 22.1, 19.7, 18.3. MS (ESI)  $m/z$ : 692.2 ( $\text{M}+\text{Na}^+$ ).

To a solution of above obtained S-trityl analogue **4b'**(15mg, 0.022mmol) in  $\text{CH}_2\text{Cl}_2$  (5mL) $\text{Et}_3\text{SiH}$  (9mg, 0.074mmol) and TFA (255mg, 2.2mmol)were addedsequentially. The resulting mixture was stirred for 2h at room temperature and then concentrated under reduced pressure. The obtained residue was purified by silica gel column chromatography (petroleum ether/ $\text{EtOAc}$ , 2/1) to afford compound **4b** as a pale yellow oil (7mg, 72.9%).  $^1\text{H}$  NMR(300 MHz,  $\text{CDCl}_3$ ):  $\delta$  8.86(s, 1H), 8.11(s, 1H), 7.22(d,  $J=8.4\text{Hz}$ , 1H), 5.78(dt,  $J=15.3,6.3\text{Hz}$ , 1H), 5.65(dt,  $J=15.3,6.0\text{Hz}$ , 1H), 4.61(t,  $J=5.1\text{Hz}$ , 1H), 4.53(dd,  $J=8.7,5.1\text{Hz}$ , 1H), 4.32(t,  $J=6.6\text{Hz}$ , 1H), 3.81(d,  $J=11.1\text{Hz}$ , 1H), 3.37(d,  $J=11.4\text{Hz}$ , 1H), 2.55-2.67(m, 2H), 2.33-2.50(m, 2H), 2.13-2.20(m, 1H), 1.62(s, 3H), 0.88(d,  $J=6.9\text{Hz}$ , 3H), 0.84(d,  $J=6.9\text{Hz}$ , 3H).  $^{13}\text{C}$  NMR(75 MHz,  $\text{CDCl}_3$ ):  $\delta$  174.7, 171.6, 163.7, 153.5, 150.0, 131.1, 129.0, 120.9, 85.4, 65.7, 57.2, 41.7, 31.3, 30.8, 29.9, 24.9, 19.3, 17.9.HRMS (ESI) ( $m/z$ ):Calcd for  $\text{C}_{18}\text{H}_{25}\text{N}_3\text{O}_3\text{S}_3\text{Na}^+$ ,450.0950( $\text{M}+\text{Na}^+$ ),Found 450.1128.

Following the same procedure as for **4a**,S-trityl analogue**4d'** was obtained as a yellow oil (25mg, 53.6% based onrecovered starting material).  $^1\text{H}$  NMR(300 MHz,  $\text{CDCl}_3$ ):  $\delta$  7.84(s, 1H), 7.39-7.42(m, 6H), 7.27-7.35(m, 6H), 7.17-7.25(m, 3H), 5.63(dt,  $J=15.6,6.0\text{Hz}$ , 1H), 5.49(dt,  $J=15.3,6.0\text{Hz}$ , 1H), 4.48-4.60(m, 3H), 3.79(d,  $J=11.4\text{Hz}$ , 1H), 3.33(d,  $J=11.7\text{Hz}$ , 1H), 2.75(s, 3H), 2.24(t,  $J=6.9\text{Hz}$ , 2H), 2.05-2.16(m, 3H), 1.59(s, 3H), 0.86 (d,  $J=6.9\text{Hz}$ , 3H), 0.81(d,  $J=6.9\text{Hz}$ , 3H).  $^{13}\text{C}$  NMR(75 MHz,  $\text{CDCl}_3$ ):  $\delta$  174.8, 171.5, 166.8, 163.6, 148.9, 145.1, 134.7, 129.8, 128.1, 126.8, 125.1, 120.9, 85.4, 66.9, 65.7, 57.2, 41.7, 31.6, 31.4, 31.3, 25.0, 19.5, 19.3, 17.9. MS (ESI)  $m/z$ : 706.2 ( $\text{M}+\text{Na}^+$ ).

Following the same procedure as for **4b**, compound **4d** was obtained as a pale yellow oil (13mg, 83.9%).  $^1\text{H}$  NMR(300 MHz,  $\text{CDCl}_3$ ):  $\delta$  7.86(s, 1H), 7.21(d,  $J=8.7\text{Hz}$ , 1H), 5.77(dt,  $J=15.6, 6.0\text{Hz}$ , 1H), 5.67(dt,  $J=15.3, 6.0\text{Hz}$ , 1H), 4.62(t,  $J=5.4\text{Hz}$ , 1H), 4.51(dd,  $J=8.7, 5.4\text{Hz}$ , 1H), 4.31(t,  $J=6.6\text{Hz}$ , 1H), 3.81(d,  $J=11.4\text{Hz}$ , 1H), 3.33(d,  $J=11.7\text{Hz}$ , 1H), 2.76(s, 3H), 2.54-2.69(m, 2H), 2.34-2.41(m, 2H), 2.07-2.20(m, 1H), 1.61(s, 3H), 0.90(d,  $J=6.9\text{Hz}$ , 3H), 0.84(d,  $J=6.9\text{Hz}$ , 3H).  $^{13}\text{C}$  NMR(75 MHz,  $\text{CDCl}_3$ ):  $\delta$  174.8, 171.5, 166.9, 163.7, 148.7, 131.1, 129.0, 121.1, 85.2, 65.7, 57.2, 41.7, 31.3, 30.7, 29.9, 24.9, 19.5, 19.3, 17.9. HRMS (ESI) ( $m/z$ ): Calcd for  $\text{C}_{19}\text{H}_{27}\text{N}_3\text{O}_3\text{S}_3\text{Na}^+$ , 464.1107( $\text{M}+\text{Na}^+$ ), Found 464.1288.

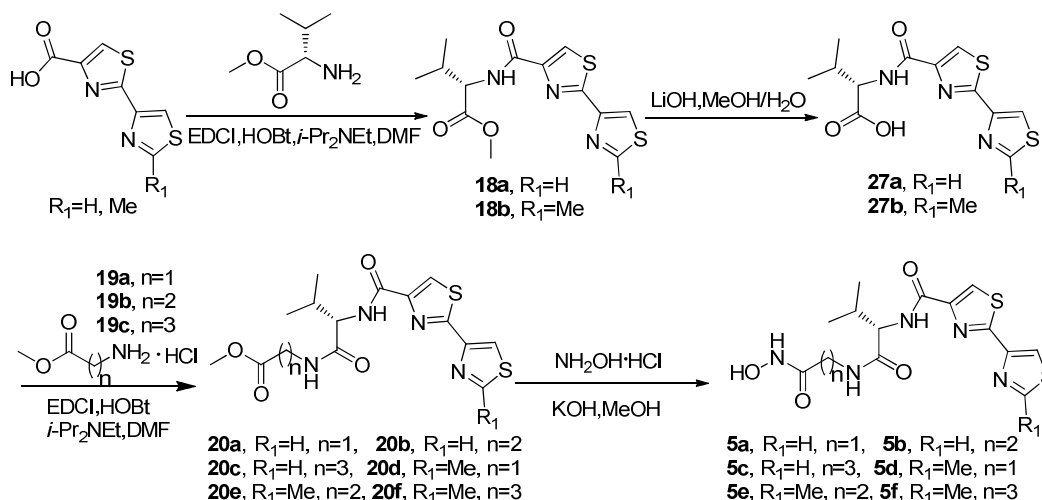

#### Preparation procedure for **18a-18b**

To a solution of bisthiazole carboxylic acid (600mg, 2.83mmol) in dry DMF (10mL, 0.28M) was added EDCI (542mg, 2.83mmol), HOBT (382mg, 2.83mmol), *L*-Valinemethyl ester (521mg, 3.11mmol) and *i*-Pr<sub>2</sub>NEt (1.09g, 8.48mmol), sequentially. The reaction mixture was stirred for 12h at room temperature. The mixture was then diluted with H<sub>2</sub>O and extracted with EtOAc. The combined organic phase was washed with brine, dried over anhydrous Na<sub>2</sub>SO<sub>4</sub> and then concentrated under reduced pressure. The obtained residue was purified by silica gel column chromatography (petroleum ether/EtOAc, 3/1 to 2/1) to afford **18a** as a pale yellow oil (630mg, 68.5%).  $^1\text{H}$  NMR(300 MHz,  $\text{CDCl}_3$ ):  $\delta$  8.79(s, 1H), 8.06(s, 1H), 8.00(s, 1H), 7.75(d,  $J=8.7\text{Hz}$ , 1H), 4.65(dd,  $J=9.3, 5.4\text{Hz}$ , 1H), 3.68(s, 3H), 2.18-2.24(m, 1H), 0.93(d,  $J=6.6\text{Hz}$ , 6H).  $^{13}\text{C}$  NMR(75 MHz,  $\text{CDCl}_3$ ):  $\delta$  171.8, 162.0, 160.3, 153.4, 149.9, 149.0, 123.8, 116.3, 56.7, 51.7, 31.0, 18.6, 17.6. MS (ESI)  $m/z$ : 326.1 ( $\text{M}+\text{H}^+$ ).

Following similar procedure, **18b** was obtained as a pale yellow oil (67.6%).  $^1\text{H}$  NMR(300 MHz,  $\text{CDCl}_3$ ):  $\delta$  7.93(s, 1H), 7.67(s, 1H), 4.52(dd,  $J=9.0, 5.4\text{Hz}$ , 1H), 3.57(s, 3H), 2.51(s, 3H), 2.07-2.11(m, 1H), 0.81(d,  $J=6.6\text{Hz}$ , 6H).  $^{13}\text{C}$  NMR(75 MHz,  $\text{CDCl}_3$ ):  $\delta$  171.8, 166.6, 162.3, 160.5, 149.9, 147.7, 123.7, 116.3, 56.9, 51.8, 31.2, 18.8, 18.7, 17.7. MS (ESI)  $m/z$ : 362.1 ( $\text{M}+\text{Na}^+$ ).

#### Preparation procedure for **27a-27b**

To a stirred solution of **18a** (630mg, 1.94mmol) in MeOH/H<sub>2</sub>O (4/1, v/v, 50mL) was added LiOH (163mg, 3.88mmol) at 0°C. The reaction mixture was stirred for 12h at

room temperature and then concentrated under reduced pressure. The resulting aqueous mixture was acidified with 1N HCl solution to pH 2.0, and then extracted with EtOAc. The combined organic phase was washed with brine, dried over anhydrous Na<sub>2</sub>SO<sub>4</sub> and concentrated under reduced pressure to afford the acid **27a** as a white solid (600mg, 99.5%). <sup>1</sup>H NMR (300 MHz, CD<sub>3</sub>OD): δ 9.09(d, *J*=3.3Hz, 1H), 8.37(d, *J*=3.3Hz, 1H), 8.26(s, 1H), 4.58(dd, *J*=8.7, 5.1Hz, 1H), 2.31-2.38(m, 1H), 1.06(d, *J*=6.9Hz, 6H). MS (ESI) *m/z*: 312.1 (M+H<sup>+</sup>).

Following similar procedure, the respective acid **27b** from **18b** was obtained as a white solid (93.1%). <sup>1</sup>H NMR (300 MHz, CDCl<sub>3</sub>): δ 8.16(s, 1H), 7.88(s, 1H), 4.77(dd, *J*=9.0, 4.8Hz, 1H), 2.77(s, 3H), 2.35-2.42(m, 1H), 1.06(d, *J*=6.6Hz, 6H). MS (ESI) *m/z*: 326.1 (M+H<sup>+</sup>).

#### Preparation procedure for **20a-20f**

To a solution of the acid **27a** (80mg, 0.26mmol) in dry DMF (5mL) was added EDCI (49mg, 0.26mmol), HOBt (35mg, 0.26mmol), **19a** (36mg, 0.28mmol) and *i*-Pr<sub>2</sub>NEt (99mg, 0.75mmol). The resulting mixture was stirred for 12h at room temperature, after which the reaction mixture was diluted with H<sub>2</sub>O and extracted with EtOAc. The combined organic phase was washed with brine, dried over anhydrous Na<sub>2</sub>SO<sub>4</sub> and then concentrated under reduced pressure. The residue was purified by silica gel column chromatography (petroleum ether/EtOAc/MeOH, 15/15/1) to afford **20a** as a colorless oil (79mg, 80.2%). <sup>1</sup>H NMR (300 MHz, CDCl<sub>3</sub>): δ 8.81(s, 1H), 8.10(s, 1H), 8.05(s, 1H), 7.93(d, *J*=9.0Hz, 1H), 7.47(t, *J*=5.1Hz, 1H), 4.59(dd, *J*=9.0, 7.5Hz, 1H), 4.13(dd, *J*=18, 6.0Hz, 1H), 3.93(dd, *J*=18.3, 5.4Hz, 1H), 3.67(s, 3H), 2.20-2.29(m, 1H), 0.99(d, *J*=6.6Hz, 6H). <sup>13</sup>C NMR (75 MHz, CDCl<sub>3</sub>): δ 171.6, 170.2, 162.6, 161.1, 153.8, 150.3, 149.5, 124.3, 117.0, 58.4, 52.3, 41.2, 31.5, 19.4, 18.3. MS (ESI) *m/z*: 383.1 (M+H<sup>+</sup>).

Following similar procedure, **20b** was obtained as a colorless oil (96.6% for two steps). <sup>1</sup>H NMR (300 MHz, CDCl<sub>3</sub>): δ 8.79(s, 1H), 8.08(s, 1H), 8.03(s, 1H), 7.90(d, *J*=6.9Hz, 1H), 7.30(t, *J*=4.8Hz, 1H), 4.43(dd, *J*=9.0, 6.6Hz, 1H), 3.56(s, 3H), 3.41(t, *J*=6.0Hz, 2H), 2.51(t, *J*=5.4Hz, 2H), 2.09-2.20(m, 1H), 0.91(d, *J*=5.7Hz, 6H). <sup>13</sup>C NMR (75 MHz, CDCl<sub>3</sub>): δ 172.7, 171.3, 162.7, 161.1, 153.9, 150.6, 149.6, 124.3, 117.1, 58.6, 51.9, 35.3, 33.9, 31.7, 19.4, 18.5. MS (ESI) *m/z*: 419.1 (M+Na<sup>+</sup>).

Following similar procedure, **20c** was obtained as a colorless oil (98.4% over two steps). <sup>1</sup>H NMR (300 MHz, CDCl<sub>3</sub>): δ 8.90(s, 1H), 8.15(s, 1H), 8.05(d, *J*=8.7Hz, 1H), 7.46(t, *J*=5.4Hz, 1H), 4.56(dd, *J*=8.7, 6.9Hz, 1H), 3.65(s, 3H), 3.39-3.43(m, 1H), 3.28-3.33(m, 1H), 2.38-2.43(m, 2H), 2.25-2.31(m, 1H), 1.90(t, *J*=6.9Hz, 2H), 1.05(d, *J*=6.9Hz, 6H). <sup>13</sup>C NMR (75 MHz, CDCl<sub>3</sub>): δ 173.6, 171.1, 162.5, 160.9, 153.8, 150.4, 149.4, 124.0, 116.9, 59.6, 51.6, 38.8, 36.4, 31.6, 24.6, 19.4, 18.4. MS (ESI) *m/z*: 411.1 (M+H<sup>+</sup>).

Following similar procedure, **20d** was obtained as a colorless oil (75.3% over two steps). <sup>1</sup>H NMR (300 MHz, CDCl<sub>3</sub>): δ 8.07(s, 1H), 7.91(d, *J*=9.0Hz, 1H), 7.83(s, 1H), 7.44(t, *J*=5.4Hz, 1H), 4.58(dd, *J*=9.0, 7.2Hz, 1H), 4.13(d, *J*=6.0Hz, 1H), 3.92(d, *J*=4.8Hz, 1H), 3.67(s, 3H), 2.70(s, 3H), 2.23-2.29(m, 1H), 0.99(d, *J*=6.6Hz, 6H). <sup>13</sup>C NMR (75 MHz, CDCl<sub>3</sub>): δ 171.2, 169.8, 166.6, 162.4, 160.8, 149.8, 147.7, 123.7, 116.4, 58.1, 51.9, 40.8, 31.0, 19.0, 18.8, 18.0. MS (ESI) *m/z*: 419.1 (M+Na<sup>+</sup>).

Following similar procedure, **20e** was obtained as colorless oil (91% over two steps). <sup>1</sup>H NMR (300 MHz, CDCl<sub>3</sub>): δ 8.09(s, 1H), 7.92(d, *J*=9.6Hz, 1H), 7.83(s, 1H), 7.28(t, *J*=5.7Hz, 1H), 4.47(dd, *J*=8.1, 6.0Hz, 1H), 3.59(s, 3H), 3.44(q, *J*=6.0Hz, 2H), 2.69(s, 3H), 2.55(t, *J*=5.4Hz, 2H), 2.14-2.20(m, 1H), 0.95(d, *J*=6.6Hz, 6H). <sup>13</sup>C NMR (75 MHz, CDCl<sub>3</sub>): δ 172.6, 171.2, 167.0, 162.7, 161.1, 150.3, 148.1, 123.9, 116.7, 58.5, 51.8, 35.2, 33.9, 31.6, 19.3, 19.2, 18.4. MS (ESI) *m/z*: 433.1 (M+Na<sup>+</sup>).

Following similar procedure, **20f** was obtained as a colorless oil (70.5% over two steps). <sup>1</sup>H NMR (300 MHz, CDCl<sub>3</sub>): δ 8.05(s, 1H), 7.94(d, *J*=9.3Hz, 1H), 7.85(s, 1H), 7.18(t, *J*=6.0Hz, 1H), 4.46(dd, *J*=9.0, 5.1Hz, 1H), 3.59(s, 3H), 3.33-3.53(m, 1H), 3.19-3.32(m, 1H), 2.71(s, 3H), 2.30-2.61(m, 2H), 2.16-2.27(m, 1H), 1.83(t, *J*=7.2Hz, 2H), 1.00(d, *J*=6.6Hz, 6H). <sup>13</sup>C NMR (75 MHz, CDCl<sub>3</sub>): δ 174.2, 171.7, 167.5, 163.2, 161.6, 150.7, 148.6, 124.4, 117.2, 59.3, 52.2, 39.4, 31.9, 31.8, 25.1, 19.9, 19.7, 19.0. MS (ESI) *m/z*: 447.1 (M+Na<sup>+</sup>).

#### Preparation procedure for compound **5a-5f**

To a mixture of hydroxylamine hydrochloride (144mg, 2.1mmol) in dry MeOH (10mL) was added solid KOH (176mg, 3.15mmol) and the resulting mixture was stirred for 5 min at room temperature. The mixture was filtered and compound **20a** (79mg, 0.21mmol) was added to the filtrate. The resulting mixture was stirred for 1h at room temperature. The mixture was then acidified with 1N HCl to pH 5-6 and concentrated under reduced pressure. The obtained residue was dissolved in EtOAc. This EtOAc solution was washed with brine, dried over anhydrous Na<sub>2</sub>SO<sub>4</sub> and concentrated under reduced pressure. The obtained residue was further purified by silica gel column chromatography (CHCl<sub>3</sub>/MeOH, 20/1 to 10/1) to afford compound **5a** as a pale yellow solid (18mg, 22.8%). <sup>1</sup>H NMR (300 MHz, CD<sub>3</sub>OD): δ 9.09(s, 1H), 8.36(s, 1H), 8.26(s, 1H), 7.89(s, 1H), 4.46(d, *J*=6.6Hz, 1H), 3.85(d, *J*=6.6Hz, 2H), 2.23-2.26(m, 1H), 1.06(d, *J*=6.9Hz, 6H). <sup>13</sup>C NMR (75 MHz, CD<sub>3</sub>OD): δ 174.0, 168.5, 164.3, 163.3, 156.5, 151.2, 150.6, 126.0, 119.1, 60.3, 41.5, 32.6, 19.9, 18.9. HRMS (ESI) (*m/z*): Calcd for C<sub>14</sub>H<sub>17</sub>N<sub>5</sub>O<sub>4</sub>S<sub>2</sub>Na<sup>+</sup>, 406.0614 (M+Na<sup>+</sup>), Found 406.0615.

Following similar procedure, compound **5b** was obtained as a pale yellow solid (40%). <sup>1</sup>H NMR (300 MHz, CD<sub>3</sub>OD): δ 9.08(s, 1H), 8.36(s, 1H), 8.28(d, *J*=9.0Hz, 1H), 8.24(s, 1H), 7.89(s, 1H), 4.39(t, *J*=7.2Hz, 1H), 3.50(q, *J*=4.8Hz, 2H), 2.34(t, *J*=6.9Hz, 2H), 2.15-2.22(m, 1H), 1.03(d, *J*=6.6Hz, 6H). <sup>13</sup>C NMR (75 MHz, CD<sub>3</sub>OD): δ 173.6, 170.5, 164.3, 163.0, 156.5, 151.2, 150.5, 125.9, 119.1, 60.1, 37.0, 33.5, 32.8, 19.9, 18.9. HRMS (ESI) (*m/z*): Calcd for C<sub>15</sub>H<sub>19</sub>N<sub>5</sub>O<sub>4</sub>S<sub>2</sub>Na<sup>+</sup>, 420.0776 (M+Na<sup>+</sup>), Found 420.0771.

Following similar procedure, compound **5c** was obtained as a pale yellow solid (30.8%). <sup>1</sup>H NMR (300 MHz, CD<sub>3</sub>OD): δ 9.90(s, 1H), 8.36(s, 1H), 8.25(s, 1H), 7.89(s, 1H), 4.39(t, *J*=7.2Hz, 1H), 3.28(q, *J*=8.9Hz, 2H), 2.11-2.21(m, 3H), 1.83(q, *J*=7.8Hz, 2H), 1.04(d, *J*=6.9Hz, 6H). <sup>13</sup>C NMR (75 MHz, CD<sub>3</sub>OD): δ 173.5, 172.4, 164.4, 163.1, 156.5, 151.3, 150.6, 125.9, 119.1, 60.4, 39.9, 32.8, 31.3, 26.6, 19.9, 18.9. HRMS (ESI) (*m/z*): Calcd for C<sub>16</sub>H<sub>21</sub>N<sub>5</sub>O<sub>4</sub>S<sub>2</sub>Na<sup>+</sup>, 434.0927 (M+Na<sup>+</sup>), Found 434.0931.

Following similar procedure, **5d** was obtained as a pale yellow solid (29%). <sup>1</sup>H NMR (300 MHz, DMSO-*d*<sub>6</sub>): δ 10.55(s, 1H), 8.86(s, 1H), 8.54(t, *J*=5.4Hz, 1H), 8.33(s, 1H), 8.23(s, 1H), 8.01(d, *J*=9.0Hz, 1H), 4.45(t, *J*=6.3Hz, 1H), 3.50(d, *J*=4.2Hz, 2H), 2.73(s, 3H), 2.10(m, 1H), 0.94(d, *J*=6.9Hz, 3H), 0.89(d, *J*=6.9Hz, 3H). <sup>13</sup>C NMR (75 MHz, DMSO-*d*<sub>6</sub>): δ

170.9, 167.6, 165.6, 162.3, 160.0, 150.2, 147.0, 124.8, 118.1, 57.4, 38.7, 31.3, 19.3, 18.8, 18.2. HRMS (ESI) ( $m/z$ ): Calcd for  $C_{15}H_{19}N_5O_4S_2Na^+$ , 420.0776 ( $M+Na^+$ ), Found 420.0771.

Following similar procedure, **5e** was obtained as a pale yellow solid (29%).  $^1H$  NMR (300 MHz,  $CD_3OD$ ):  $\delta$  8.27(d,  $J=8.4$ Hz, 1H), 8.21(s, 1H), 8.12(s, 1H), 7.89(s, 1H), 4.38(d,  $J=6.0$ Hz, 1H), 3.36(t,  $J=6.0$ Hz, 2H), 2.76(s, 3H), 2.34(t,  $J=6.0$ Hz, 2H), 2.15-2.21(m, 1H), 1.02(d,  $J=6.6$ Hz, 6H).  $^{13}C$  NMR (75 MHz,  $CD_3OD$ ):  $\delta$  173.6, 170.5, 169.4, 164.3, 163.0, 151.2, 149.2, 125.6, 118.8, 60.2, 37.0, 33.5, 32.8, 19.9, 18.9, 18.8. HRMS (ESI) ( $m/z$ ): Calcd for  $C_{16}H_{21}N_5O_4S_2Na^+$ , 434.0927 ( $M+Na^+$ ), Found 434.0927.

Following similar procedure, **5f** was obtained as a pale yellow solid (18.2%).  $^1H$  NMR (300 MHz,  $DMSO-d_6$ ):  $\delta$  10.37(s, 1H), 8.71(s, 1H), 8.33(s, 1H), 8.28(t,  $J=5.7$ Hz, 1H), 8.25(s, 1H), 7.96(d,  $J=9.0$ Hz, 1H), 4.34(dd,  $J=8.7, 7.2$ Hz, 1H), 3.08(m, 2H), 2.74(s, 3H), 2.07(m, 1H), 1.96(t,  $J=7.2$ Hz, 2H), 1.65(m, 2H), 0.96(d,  $J=6.6$ Hz, 3H), 0.89(d,  $J=6.0$ Hz, 3H).  $^{13}C$  NMR (75 MHz,  $DMSO-d_6$ ):  $\delta$  170.4, 168.7, 167.5, 162.3, 159.9, 150.1, 146.9, 124.7, 118.1, 57.5, 38.3, 31.3, 29.9, 25.2, 19.3, 18.8, 18.3. HRMS (ESI) ( $m/z$ ): Calcd for  $C_{17}H_{23}N_5O_4S_2Na^+$ , 448.1084 ( $M+Na^+$ ), Found 448.1079.

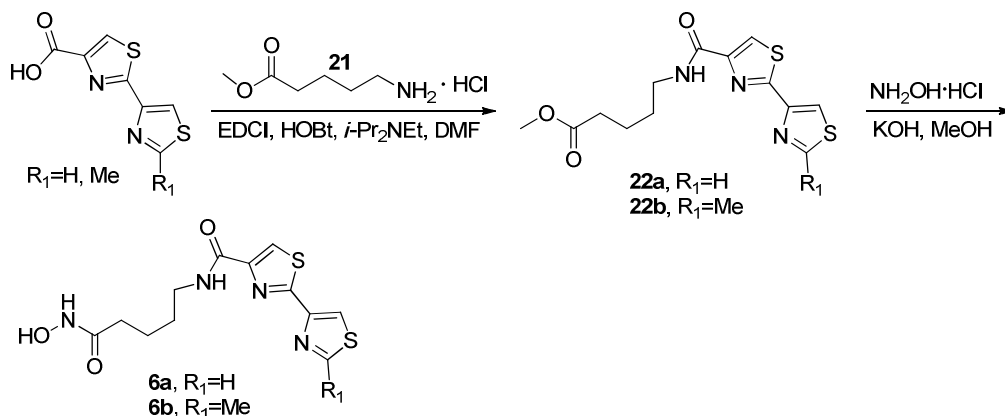

#### Preparation procedure for 22a-22b

To a solution of the bisthiazole carboxylic acid (60mg, 0.28mmol, prepared from **10a**) in dry DMF (5mL) was added EDCI (54mg, 0.28mmol), HOBT (38mg, 0.28mmol), **21** (52mg, 0.31mmol) and *i*-Pr<sub>2</sub>NEt (109mg, 0.85mmol). The resulting mixture was stirred for 12h at room temperature. The mixture was then diluted with H<sub>2</sub>O and extracted with EtOAc. The combined organic phase was washed with brine, dried over anhydrous Na<sub>2</sub>SO<sub>4</sub>, and concentrated under reduced pressure. The obtained residue was purified by silica gel column chromatography (petroleum ether/EtOAc/MeOH, 10/10/1) to afford **22a** as a colorless oil (79mg, 85.9%).  $^1H$  NMR (300 MHz,  $CDCl_3$ ):  $\delta$  8.81(s, 1H), 8.05(s, 1H), 7.98(s, 1H), 7.48(t,  $J=5.4$ Hz, 1H), 3.58(s, 3H), 3.40(q,  $J=6.6$ Hz, 2H), 2.29(t,  $J=7.2$ Hz, 2H), 1.55-1.71(m, 4H).  $^{13}C$  NMR (75 MHz,  $CDCl_3$ ):  $\delta$  173.8, 162.3, 161.0, 153.9, 150.9, 149.5, 123.7, 116.6, 51.5, 38.9, 33.5, 29.1, 22.2. MS (ESI)  $m/z$ : 326.1 ( $M+H^+$ ).

Following similar procedure, **22b** was obtained as a pale yellow oil (71.1%).  $^1H$  NMR (300 MHz,  $CDCl_3$ ):  $\delta$  8.03(s, 1H), 7.77(s, 1H), 7.48(t,  $J=5.4$ Hz, 1H), 3.60(s, 3H), 3.41(q,  $J=6.6$ Hz, 2H), 2.70(s, 3H), 2.31(t,  $J=6.9$ Hz, 2H), 1.59-1.70(m, 4H).  $^{13}C$  NMR (75 MHz,  $CDCl_3$ ):  $\delta$  173.5, 166.7, 162.1, 160.7, 150.4, 147.8, 123.0, 116.0, 51.2, 38.5, 33.2,

28.8, 21.9, 18.8. MS (ESI)  $m/z$ : 340.1 ( $M+H^+$ ).

#### Preparation procedure for compound 6a-6b

To a mixture of hydroxylamine hydrochloride (169mg, 2.4mmol) in dry MeOH (10mL) was added solid KOH (204mg, 3.65mmol) and the resulting mixture was stirred for 5 min at room temperature. The mixture was then filtered and **22a** (79mg, 0.24mmol) was added to the filtrate. The resulting mixture was stirred for 1h at room temperature. The mixture was then acidified with 1N HCl to pH 5-6 and concentrated under reduced pressure. The obtained residue was dissolved in EtOAc. This EtOAc solution was washed with brine, dried over anhydrous  $Na_2SO_4$  and concentrated under reduced pressure. The obtained residue was further purified by silica gel column chromatography ( $CHCl_3/MeOH$ , 10/1) to afford compound **6a** as a pale yellow solid (40mg, 50%).  $^1H$  NMR (300 MHz,  $CD_3OD$ ):  $\delta$  9.06(s, 1H), 8.59(t,  $J=5.7$ Hz, 1H), 8.30(s, 1H), 8.17(s, 1H), 3.42(q,  $J=5.4$ Hz, 2H), 1.98(t,  $J=6.9$ Hz, 2H), 1.53 (m, 4H).  $^{13}C$  NMR (75 MHz,  $DMSO-d_6$ ):  $\delta$  169.7, 162.6, 161.0, 156.9, 151.7, 149.3, 124.8, 118.7, 39.1, 32.7, 29.6, 23.4. HRMS (ESI) ( $m/z$ ): Calcd for  $C_{12}H_{14}N_4O_3S_2Na^+$ , 349.0400 ( $M+Na^+$ ), Found 349.0406.

Following similar procedure, compound **6b** was obtained as a pale yellow solid (55%).  $^1H$  NMR (300 MHz,  $CD_3OD$ ):  $\delta$  8.15(s, 1H), 8.09(s, 1H), 3.43(q,  $J=6.9$ Hz, 2H), 2.75(s, 3H), 2.15(t,  $J=6.9$ Hz, 2H), 1.68(m, 4H).  $^{13}C$  NMR (75 MHz,  $DMSO-d_6$ ):  $\delta$  169.0, 167.5, 161.9, 160.3, 150.9, 147.3, 123.6, 117.3, 38.7, 32.1, 28.9, 22.9, 17.6. HRMS (ESI) ( $m/z$ ): Calcd for  $C_{13}H_{16}N_4O_3S_2Na^+$ , 363.0556 ( $M+Na^+$ ), Found 363.0578.

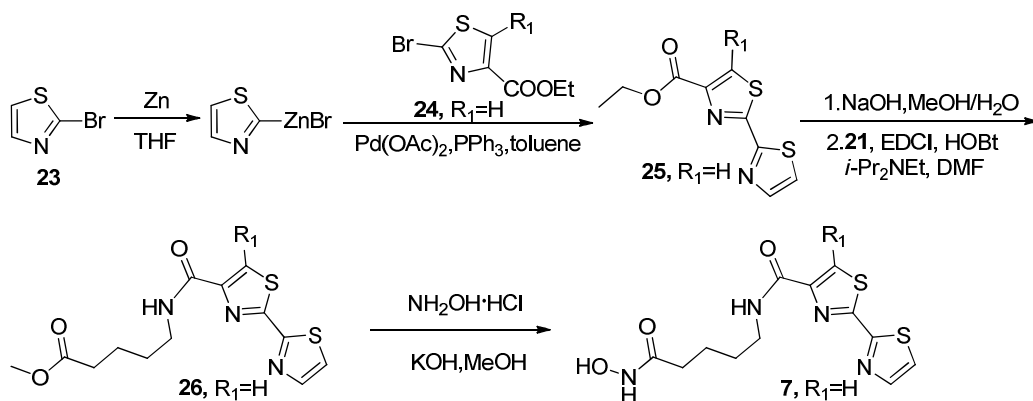

#### Preparation procedure for **25**

A solution of 2-bromothiazole **23** (5.51g, 0.034mol) under  $N_2$  atmosphere was added dropwise to a suspension of activated Zn powder (1.87g, 0.029mol) in dry THF (30mL). The resulting mixture was heated to reflux for 2h. The reaction mixture was then cooled to room temperature and  $Pd(OAc)_2$  (272mg, 1.2mmol),  $PPh_3$  (630mg, 2.4mmol) and 2-bromothiazole **24** were added. The reaction mixture was again heated to reflux for several hours until most of 2-bromothiazole **23** was consumed. The reaction mixture was then cooled to room temperature and concentrated under reduced pressure. The residue was diluted with  $CH_2Cl_2$  and the obtained suspension washed sequentially with 1N HCl and brine. The  $CH_2Cl_2$  solution was dried over anhydrous  $Na_2SO_4$  and concentrated under reduced pressure to afford the crude coupling product **25** as a yellow oil (9.0g).  $^1H$  NMR (300 MHz,  $CDCl_3$ ):  $\delta$  8.20(s, 1H),

7.86(d,  $J=3.3$ Hz, 1H), 7.48(d,  $J=3.3$ Hz, 1H), 4.40(q,  $J=6.9$ Hz, 2H), 1.38(t,  $J=7.2$ Hz, 3H). To a stirred solution of above obtained coupling product **25** (9.0g, 0.04mmol) in MeOH/H<sub>2</sub>O (4:1, v/v, 50mL) was added solid NaOH (3g, 0.07mol) at 0°C. The resulting mixture was heated to reflux for 1h and then cooled to room temperature. After removal of MeOH under reduced pressure, the resulting aqueous mixture was extracted with Et<sub>2</sub>O. The aqueous phase was then acidified with 1N HCl to pH 2.0 and extracted with EtOAc. The combined EtOAc extract was washed with brine, dried over anhydrous Na<sub>2</sub>SO<sub>4</sub> and concentrated under reduced pressure to afford the corresponding acid as a yellow solid (2.3g, 44.7% over two steps). <sup>1</sup>H NMR (300 MHz, CD<sub>3</sub>OD): δ 9.05(d,  $J=3.3$ Hz, 1H), 8.43(d,  $J=3.3$ Hz, 1H), 8.35(s, 1H). MS (ESI)  $m/z$ : 263.0 (M+Na<sup>+</sup>).

Following similar preparation procedure for **22a**, intermediate **26** was prepared from the above obtained acid as a colorless oil (73.9%). <sup>1</sup>H NMR (300 MHz, CDCl<sub>3</sub>): δ 8.04(s, 1H), 7.75(d,  $J=3.3$ Hz, 1H), 7.39(t,  $J=6.0$ Hz, 1H), 7.37(d,  $J=3.3$ Hz, 1H), 3.51(s, 3H), 3.34(q,  $J=6.6$ Hz, 2H), 2.23(t,  $J=6.3$ Hz, 2H), 1.55-1.60(m, 4H). <sup>13</sup>C NMR (75 MHz, CDCl<sub>3</sub>): δ 173.6, 161.1, 160.4, 160.2, 150.8, 144.0, 124.6, 121.7, 51.4, 38.8, 33.4, 29.0, 22.1. MS (ESI)  $m/z$ : 326.1 (M+H<sup>+</sup>).

Following similar preparation procedure for **6a**, compound **7** was prepared from intermediate **26** as a pale yellow solid (42.6%). <sup>1</sup>H NMR (300 MHz, CD<sub>3</sub>OD): δ 8.53(t,  $J=5.4$ Hz, 1H), 8.27(s, 1H), 7.92(d,  $J=3.0$ Hz, 1H), 7.89(s, 1H), 7.77(d,  $J=3.0$ Hz, 1H), 3.43(q,  $J=6.0$ Hz, 2H), 2.16(t,  $J=6.6$ Hz, 2H), 1.66-1.69(m, 4H). <sup>13</sup>C NMR (75 MHz, CD<sub>3</sub>OD): δ 172.8, 163.1, 162.9, 161.9, 152.1, 145.3, 126.7, 123.9, 40.2, 33.5, 30.2, 24.3. HRMS (ESI) ( $m/z$ ): Calcd for C<sub>12</sub>H<sub>14</sub>N<sub>4</sub>O<sub>3</sub>S<sub>2</sub>Na<sup>+</sup>, 349.0400 (M+Na<sup>+</sup>), Found 349.0401.

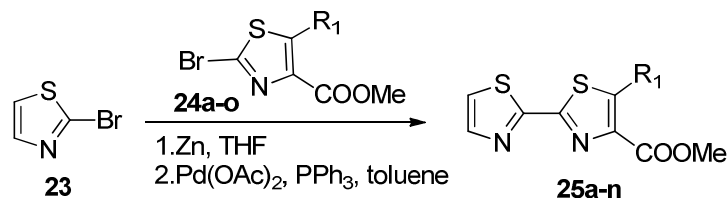

#### Preparation procedure for **25a-n**

**25a-o** was obtained according to the preparation procedure for **25**.

**25a**: (white powder, 75%). <sup>1</sup>H NMR (300 MHz, CDCl<sub>3</sub>): δ 7.86(d,  $J=3.3$ Hz, 1H), 7.46(d,  $J=3.3$ Hz, 1H), 3.96(s, 3H), 3.15(d,  $J=6.9$ Hz, 2H), 1.95-1.23(m, 1H), 0.99(d,  $J=6.6$ Hz, 6H). <sup>13</sup>C NMR (75 MHz, CDCl<sub>3</sub>): δ 162.1, 160.4, 157.3, 151.2, 143.5, 141.5, 121.3, 51.9, 35.8, 30.6, 21.9. MS (ESI)  $m/z$ : 283.0 (M+H<sup>+</sup>).

**25b**: (yellow oil, 45%). <sup>1</sup>H NMR (300 MHz, CDCl<sub>3</sub>): δ 7.83(d,  $J=2.4$ Hz, 1H), 7.44(d,  $J=2.4$ Hz, 1H), 3.92(s, 3H), 2.79(s, 3H). MS (ESI)  $m/z$ : 241.0 (M+H<sup>+</sup>).

**25c**: (yellow oil, 52.1%). <sup>1</sup>H NMR (300 MHz, CDCl<sub>3</sub>): δ 7.87(d,  $J=3.3$ Hz, 1H), 7.54(d,  $J=3.3$ Hz, 1H), 3.96(s, 3H), 3.30(q,  $J=7.5$ Hz, 2H), 1.38(t,  $J=7.5$ Hz, 3H). <sup>13</sup>C NMR (75 MHz, CDCl<sub>3</sub>): δ 162.0, 160.4, 156.9, 154.3, 143.5, 140.7, 121.3, 51.8, 21.2, 15.5. MS (ESI)  $m/z$ : 255.0 (M+H<sup>+</sup>).

**25d**: (yellow oil, 86.7%). <sup>1</sup>H NMR (300 MHz, CDCl<sub>3</sub>): δ 7.62(d,  $J=3.3$ Hz, 1H), 7.30(d,  $J=3.3$ Hz, 1H), 3.90-3.94(m, 1H), 3.72(s, 3H), 1.14(d,  $J=6.9$ Hz, 6H). <sup>13</sup>C NMR (75 MHz, CDCl<sub>3</sub>): δ 162.0, 160.4, 156.8, 143.5, 143.3, 140.0, 121.2, 51.8, 27.8, 24.6. MS (ESI)

$m/z$ : 291.0 ( $M+Na^+$ ).

**25e**: (yellow oil, 54%).  $^1H$  NMR(300 MHz,  $CDCl_3$ ):  $\delta$  7.88(d,  $J=3.0$ Hz, 1H), 7.47(d,  $J=3.0$ Hz, 1H), 3.96(s, 3H), 3.29(t,  $J=7.5$ Hz, 2H), 1.68-1.78(m, 2H), 1.40-1.52(m, 2H), 0.96(t,  $J=7.5$ Hz, 3H). MS (ESI)  $m/z$ : 283.1 ( $M+H^+$ ).

**25f**: (yellow oil, 73.5%).  $^1H$  NMR(300 MHz,  $CDCl_3$ ):  $\delta$  7.85(d,  $J=3.0$ Hz, 1H), 7.45(d,  $J=3.0$ Hz, 1H), 3.96(s, 3H), 3.10-3.14(m, 1H), 1.31-1.38(m, 2H), 0.84-0.89(m, 2H). MS (ESI)  $m/z$ : 267.0 ( $M+H^+$ ).

**25g**: (yellow oil, 67.3%).  $^1H$  NMR(300 MHz,  $CDCl_3$ ):  $\delta$  7.87(d,  $J=3.3$ Hz, 1H), 7.45(d,  $J=3.3$ Hz, 1H), 3.97(s, 3H), 3.80-3.95(m, 1H), 2.12(d,  $J=10.8$ Hz, 2H), 1.76-1.88(m, 2H), 1.30-1.57(m, 6H). MS (ESI)  $m/z$ : 309.1 ( $M+H^+$ ).

**25h**: (yellow oil, 35.6%).  $^1H$  NMR(300 MHz,  $CDCl_3$ ):  $\delta$  7.92(d,  $J=3.3$ Hz, 1H), 7.51-7.57(m, 2H), 7.50(d,  $J=3.3$ Hz, 1H), 7.45-7.48(m, 3H), 3.86(s, 3H). MS (ESI)  $m/z$ : 303.0 ( $M+H^+$ ).

**25i**: (yellow oil, 56.8%).  $^1H$  NMR(300 MHz,  $CDCl_3$ ):  $\delta$  7.91(d,  $J=3.0$ Hz, 1H), 7.52-7.57(m, 2H), 7.44(d,  $J=3.0$ Hz, 1H), 7.12-7.19(m, 2H), 3.87(s, 3H). MS (ESI)  $m/z$ : 321.0 ( $M+H^+$ ).

**25j**: (yellow oil, 77.5%).  $^1H$  NMR(300 MHz,  $CDCl_3$ ):  $\delta$  8.02(d,  $J=3.3$ Hz, 1H), 7.68(d,  $J=3.3$ Hz, 1H), 7.43(t,  $J=7.8$ Hz, 1H), 7.28(dd,  $J=8.4, 2.7$ Hz, 1H), 7.11(t,  $J=7.8$ Hz, 1H), 3.81(s, 3H).  $^{13}C$  NMR(75 MHz,  $CDCl_3$ ):  $\delta$  165.3, 161.8, 161.2, 159.0, 144.6, 144.4, 142.9, 135.6, 133.5, 133.3, 123.4, 118.1, 115.0, 53.1. MS (ESI)  $m/z$ : 355.0 ( $M+H^+$ ).

**25k**: (yellow oil, 83.2%).  $^1H$  NMR(300 MHz,  $CDCl_3$ ):  $\delta$  7.98(d,  $J=3.3$ Hz, 1H), 7.60(d,  $J=3.3$ Hz, 1H), 7.52(d,  $J=7.2$ Hz, 1H), 7.36-7.44(m, 3H), 3.81(s, 3H).  $^{13}C$  NMR(75 MHz,  $CDCl_3$ ):  $\delta$  161.6, 160.8, 159.3, 144.8, 143.1, 134.2, 132.6, 131.8, 131.0, 129.9, 129.2, 126.8, 122.6, 52.6. MS (ESI)  $m/z$ : 337.0 ( $M+H^+$ ).

**25l**: (yellow oil, 87.9%).  $^1H$  NMR(300 MHz,  $CDCl_3$ ):  $\delta$  8.32(d,  $J=8.7$ Hz, 2H), 7.94(d,  $J=3.0$ Hz, 1H), 7.73(d,  $J=9.0$ Hz, 2H), 7.56(d,  $J=3.0$ Hz, 1H), 3.89(s, 3H). MS (ESI)  $m/z$ : 370.0 ( $M+Na^+$ ).

**25m**: (yellow oil, 50.4%).  $^1H$  NMR(300 MHz,  $CDCl_3$ ):  $\delta$  7.82(d,  $J=3.0$ Hz, 1H), 7.43(d,  $J=3.0$ Hz, 1H), 7.27-7.33(m, 5H), 4.60(s, 2H), 3.98(s, 3H).  $^{13}C$  NMR(75 MHz,  $CDCl_3$ ):  $\delta$  162.6, 160.8, 158.5, 152.4, 143.9, 141.3, 138.9, 129.0, 128.9, 127.4, 121.7, 52.5, 34.0. MS (ESI)  $m/z$ : 317.0 ( $M+H^+$ ).

**25n**: (yellow solid, 60%).  $^1H$  NMR(300 MHz,  $CDCl_3$ ):  $\delta$  7.88(d,  $J=3.0$ Hz, 1H), 7.47(d,  $J=3.0$ Hz, 1H), 7.33-7.47(m, 5H), 4.57(s, 2H), 3.95(s, 3H), 3.78(t,  $J=6.3$ Hz, 2H), 3.61(t,  $J=5.7$ Hz, 2H). MS (ESI)  $m/z$ : 361.1 ( $M+H^+$ ).

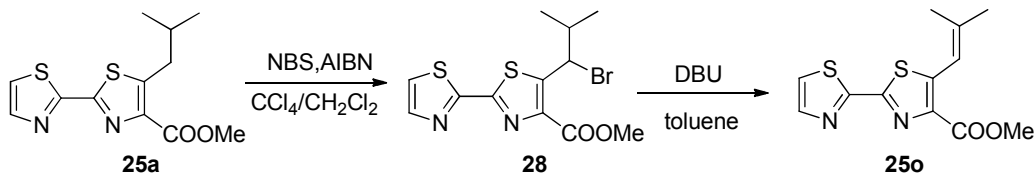

#### Preparation procedure for **25o**

NBS (1.8g, 0.01mol) and AIBN (0.2g) were added to a solution of **25a** (2.2g, 7.80mmol) in  $CCl_4$  (60mL) and  $CH_2Cl_2$  (20mL). The resulting mixture was heated to reflux for 3h and then cooled to room temperature. The reaction mixture was then concentrated under reduced pressure and the residue was dissolved in EtOAc (50mL). The EtOAc solution was washed with  $H_2O$  and brine, dried over anhydrous  $Na_2SO_4$  and concentrated under reduced pressure. The obtained residue was purified by



silica gel column chromatography (petroleum ether/EtOAc, 8/1) to afford **28** as a pale yellow solid (2.8g, 99.4%).  $^1\text{H}$  NMR (300 MHz,  $\text{CDCl}_3$ ):  $\delta$  7.90(d,  $J=3.3\text{Hz}$ , 1H), 7.51(d,  $J=3.3\text{Hz}$ , 1H), 6.11(d,  $J=8.4\text{Hz}$ , 1H), 3.98(s, 3H), 2.24(m, 1H), 1.23(d,  $J=6.6\text{Hz}$ , 3H), 1.03(d,  $J=6.6\text{Hz}$ , 3H). MS (ESI)  $m/z$ : 361.0 ( $\text{M}+\text{H}^+$ ).

To a solution of **28** (1.2g, 3.32mmol) in toluene (50mL) was added DBU (1.5g, 0.01mol) and the reaction mixture was heated to reflux for 3h. The reaction mixture was diluted with EtOAc (50mL) and washed with  $\text{H}_2\text{O}$ , 5% HCl and brine, sequentially. The organic solution was dried over anhydrous  $\text{Na}_2\text{SO}_4$  and concentrated under reduced pressure. The obtained residue was purified by silica gel column chromatography (petroleum ether/EtOAc, 8/1) to afford **25o** as a pale yellow solid (0.73g, 78.5%).  $^1\text{H}$  NMR (300 MHz,  $\text{CDCl}_3$ ):  $\delta$  7.89(d,  $J=3.3\text{Hz}$ , 1H), 7.47(d,  $J=3.0\text{Hz}$ , 1H), 7.31(t,  $J=1.2\text{Hz}$ , 1H), 3.98(s, 3H), 2.06(s, 6H). MS (ESI)  $m/z$ : 281.0 ( $\text{M}+\text{H}^+$ ).

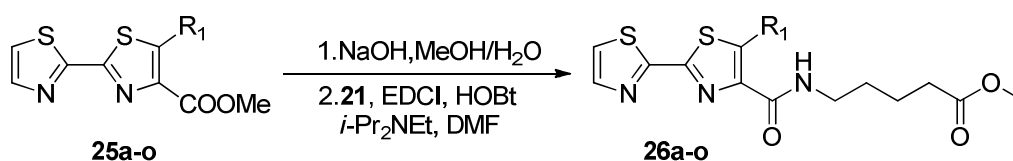

#### Preparation procedure for **26a-o**

**26a-o** was obtained according to the preparation procedure for **26**.

**26a**: (colorless oil, 85.9% over two steps).  $^1\text{H}$  NMR (300 MHz,  $\text{CDCl}_3$ ):  $\delta$  7.96(d,  $J=3.3\text{Hz}$ , 1H), 7.77(t,  $J=5.4\text{Hz}$ , 1H), 7.58(d,  $J=3.3\text{Hz}$ , 1H), 3.76(s, 3H), 3.55(q,  $J=6.3\text{Hz}$ , 2H), 3.38(d,  $J=6.9\text{Hz}$ , 2H), 2.48(t,  $J=6.0\text{Hz}$ , 2H), 2.08-2.16(m, 1H), 1.79-1.80(m, 4H), 1.10(d,  $J=6.6\text{Hz}$ , 6H).  $^{13}\text{C}$  NMR (75 MHz,  $\text{CDCl}_3$ ):  $\delta$  173.4, 161.7, 160.5, 156.2, 147.1, 143.7, 143.6, 121.0, 51.2, 38.4, 35.4, 33.2, 30.7, 29.0, 22.0. MS (ESI)  $m/z$ : 382.1 ( $\text{M}+\text{H}^+$ ).

**26b**: (colorless oil, 41.7% over two steps).  $^1\text{H}$  NMR (300 MHz,  $\text{CDCl}_3$ ):  $\delta$  7.72(d,  $J=3.3\text{Hz}$ , 1H), 7.43(t,  $J=5.7\text{Hz}$ , 1H), 7.33(d,  $J=3.3\text{Hz}$ , 1H), 3.54(s, 3H), 3.31(q,  $J=6.6\text{Hz}$ , 2H), 2.74(s, 3H), 2.25(t,  $J=6.6\text{Hz}$ , 2H), 1.57-1.65(m, 4H).  $^{13}\text{C}$  NMR (75 MHz,  $\text{CDCl}_3$ ):  $\delta$  173.7, 162.1, 160.6, 156.0, 143.8, 143.6, 142.7, 121.1, 51.4, 38.6, 33.5, 29.1, 22.2, 12.9. MS (ESI)  $m/z$ : 362.1 ( $\text{M}+\text{Na}^+$ ).

**26c**: (colorless oil, 52.1% over two steps).  $^1\text{H}$  NMR (300 MHz,  $\text{CDCl}_3$ ):  $\delta$  7.74(d,  $J=3.0\text{Hz}$ , 1H), 7.44(t,  $J=5.7\text{Hz}$ , 1H), 7.34(d,  $J=3.0\text{Hz}$ , 1H), 3.55(s, 3H), 3.35(q,  $J=6.6\text{Hz}$ , 2H), 3.29(q,  $J=7.5\text{Hz}$ , 2H), 2.27(t,  $J=6.9\text{Hz}$ , 2H), 1.51-1.68(m, 4H), 1.25(t,  $J=7.2\text{Hz}$ , 3H).  $^{13}\text{C}$  NMR (75 MHz,  $\text{CDCl}_3$ ):  $\delta$  173.7, 161.9, 160.8, 156.2, 150.6, 143.9, 142.9, 121.1, 51.4, 38.7, 33.5, 29.2, 22.2, 21.0, 16.0. MS (ESI)  $m/z$ : 354.1 ( $\text{M}+\text{H}^+$ ).

**26d**: (colorless oil, 60.0% over two steps).  $^1\text{H}$  NMR (300 MHz,  $\text{CDCl}_3$ ):  $\delta$  7.79(d,  $J=3.0\text{Hz}$ , 1H), 7.48(t,  $J=5.7\text{Hz}$ , 1H), 7.37(d,  $J=3.0\text{Hz}$ , 1H), 4.36-4.40(m, 1H), 3.59(s, 3H), 3.37(q,  $J=6.9\text{Hz}$ , 2H), 2.31(t,  $J=6.9\text{Hz}$ , 2H), 1.56-1.70(m, 4H), 1.29(d,  $J=6.9\text{Hz}$ , 6H).  $^{13}\text{C}$  NMR (75 MHz,  $\text{CDCl}_3$ ):  $\delta$  173.9, 161.9, 161.0, 157.0, 156.2, 144.0, 142.4, 121.1, 51.6, 38.7, 33.6, 29.3, 27.7, 25.2, 22.3. MS (ESI)  $m/z$ : 390.1 ( $\text{M}+\text{Na}^+$ ).

**26e**: (colorless oil, 54.0% over two steps).  $^1\text{H}$  NMR (300 MHz,  $\text{CDCl}_3$ ):  $\delta$  7.78(d,  $J=3.3\text{Hz}$ , 1H), 7.47(t,  $J=5.7\text{Hz}$ , 1H), 7.37(d,  $J=3.3\text{Hz}$ , 1H), 3.59(s, 3H), 3.37(q,  $J=6.6\text{Hz}$ , 2H), 3.31(t,  $J=7.8\text{Hz}$ , 2H), 2.31(t,  $J=6.9\text{Hz}$ , 2H), 1.56-1.71(m, 6H), 1.33-1.43(m, 2H), 0.87(t,  $J=7.5\text{Hz}$ , 3H).  $^{13}\text{C}$  NMR (75 MHz,  $\text{CDCl}_3$ ):  $\delta$  173.8, 162.0, 160.9, 156.3, 149.2, 144.0, 143.3, 121.1, 51.5, 38.8, 33.8, 33.6, 29.3, 27.0, 22.4, 22.3, 13.8. MS (ESI)  $m/z$ :

382.1 (M+H<sup>+</sup>).

**26f:** (pale yellow oil, 71.7%overtwo steps). <sup>1</sup>H NMR(300 MHz, CDCl<sub>3</sub>): δ 7.74(d, *J*=3.0Hz, 1H), 7.42(t, *J*=5.4Hz, 1H), 7.36(d, *J*=3.0Hz, 1H), 3.58(s, 3H), 3.37(q, *J*=6.3Hz, 2H), 2.30(t, *J*=6.6Hz, 2H), 1.58-1.69(m, 4H), 1.19-1.25(m, 2H), 0.68-0.74(m, 2H). <sup>13</sup>C NMR(75 MHz, CDCl<sub>3</sub>): δ 173.8, 162.2, 160.8, 154.3, 154.2, 144.1, 143.8, 121.1, 51.5, 38.7, 33.6, 29.2, 22.3, 14.0, 10.4. MS (ESI) *m/z*: 388.1 (M+Na<sup>+</sup>).

**26g:** (pale yellow oil, 79.9%overtwo steps). <sup>1</sup>H NMR(300 MHz, CDCl<sub>3</sub>): δ 7.75(d, *J*=3.0Hz, 1H), 7.49(t, *J*=6.0Hz, 1H), 7.34(d, *J*=3.0Hz, 1H), 3.97-4.04(m, 1H), 3.64(s, 3H), 3.35(q, *J*=6.3Hz, 2H), 2.28(t, *J*=6.3Hz, 2H), 2.02(d, *J*=8.7Hz, 2H), 1.61-1.68(m, 6H), 1.03-1.40(m, 6H). <sup>13</sup>C NMR(75 MHz, CDCl<sub>3</sub>): δ 174.2, 162.4, 161.4, 156.6, 156.2, 144.3, 142.7, 121.4, 51.9, 39.1, 37.4, 36.3, 34.0, 29.6, 26.8, 26.1, 22.7. MS (ESI) *m/z*: 430.1 (M+Na<sup>+</sup>).

**26h:** (colorless oil, 74.3%overtwo steps). <sup>1</sup>H NMR(300 MHz, CDCl<sub>3</sub>): δ 7.82(d, *J*=3.3Hz, 1H), 7.59-7.62(m, 2H), 7.53(t, *J*=5.7Hz, 1H), 7.42(d, *J*=3.3Hz, 1H), 7.35-7.37(m, 3H), 3.60(s, 3H), 3.36(q, *J*=6.3Hz, 2H), 2.30(t, *J*=6.6Hz, 2H), 1.62-1.66(m, 4H). <sup>13</sup>C NMR(75 MHz, CDCl<sub>3</sub>): δ 173.7, 161.0, 160.4, 158.0, 145.0, 144.1, 142.6, 130.2, 129.8, 129.3, 128.1, 121.6, 51.5, 38.9, 33.5, 29.1, 22.2. MS (ESI) *m/z*: 402.1 (M+H<sup>+</sup>).

**26i:** (colorless oil, 75.0%overtwo steps). <sup>1</sup>H NMR(300 MHz, CDCl<sub>3</sub>): δ 7.90(d, *J*=3.3Hz, 1H), 7.63-7.67(m, 2H), 7.58(t, *J*=5.7Hz, 1H), 7.50(d, *J*=3.3Hz, 1H), 7.08-7.14(m, 2H), 3.67(s, 3H), 3.42(q, *J*=6.3Hz, 2H), 2.37(t, *J*=6.3Hz, 2H), 1.68-1.71(m, 4H). <sup>13</sup>C NMR(75 MHz, CDCl<sub>3</sub>): δ 173.9, 165.0, 161.1, 158.1, 144.2, 144.0, 142.6, 132.4, 132.3, 121.7, 115.4, 115.1, 51.6, 39.0, 33.6, 29.2, 22.3. MS (ESI) *m/z*: 420.1 (M+H<sup>+</sup>).

**26j:** (colorless oil, 61.7%overtwo steps). <sup>1</sup>H NMR(300 MHz, CDCl<sub>3</sub>): δ 7.92(d, *J*=3.3Hz, 1H), 7.53(d, *J*=3.3Hz, 1H), 7.45(dd, *J*=9.0,5.7Hz, 1H), 7.24(dd, *J*=8.7,2.7Hz, 1H), 7.06(ddd, *J*=8.7,8.1,2.7Hz, 1H), 3.67(s, 3H), 3.40(q, *J*=6.9Hz, 2H), 2.36(t, *J*=6.6Hz, 2H), 1.67-1.74(m, 4H). <sup>13</sup>C NMR(75 MHz, CDCl<sub>3</sub>): δ 173.9, 164.6, 161.3, 160.5, 145.4, 144.3, 139.3, 135.2, 133.2, 133.0, 125.7, 121.9, 117.4, 114.2, 51.6, 38.9, 33.6, 29.2, 22.3. MS (ESI) *m/z*: 454.0 (M+H<sup>+</sup>).

**26k:** (colorless oil, 92.6%). <sup>1</sup>H NMR(300 MHz, CDCl<sub>3</sub>): δ 7.91(d, *J*=3.3Hz, 1H), 7.47-7.54(m, 2H), 7.44(d, *J*=3.3Hz, 1H), 7.32-7.38(m, 2H), 3.66(s, 3H), 3.40(q, *J*=6.6Hz, 2H), 2.35(t, *J*=6.9Hz, 2H), 1.63-1.73(m, 4H). <sup>13</sup>C NMR(75 MHz, CDCl<sub>3</sub>): δ 173.9, 160.6, 160.5, 159.5, 145.2, 144.3, 140.4, 134.2, 131.9, 130.5, 129.7, 129.6, 126.5, 121.9, 51.6, 38.9, 33.6, 29.2, 22.3. MS (ESI) *m/z*: 458.0 (M+Na<sup>+</sup>).

**26l:** (colorless oil, 66.4%). <sup>1</sup>H NMR(300 MHz, CDCl<sub>3</sub>): δ 8.22(d, *J*=8.7Hz, 2H), 7.90(d, *J*=3.0Hz, 1H), 7.79(d, *J*=9.6Hz, 2H), 7.58(t, *J*=6.0Hz, 1H), 7.52(d, *J*=3.0Hz, 1H), 3.64(s, 3H), 3.40(q, *J*=6.6Hz, 2H), 2.34(t, *J*=6.9Hz, 2H), 1.59-1.74(m, 4H). <sup>13</sup>C NMR(75 MHz, CDCl<sub>3</sub>): δ 174.0, 160.9, 160.1, 159.8, 148.2, 144.6, 144.0, 141.7, 136.9, 131.6, 123.4, 122.4, 51.8, 39.3, 33.7, 29.3, 22.4. MS (ESI) *m/z*: 447.1 (M+H<sup>+</sup>).

**26m:** (colorless oil, 63.2%). <sup>1</sup>H NMR(300 MHz, CDCl<sub>3</sub>): δ 7.77(d, *J*=3.3Hz, 1H), 7.53(t, *J*=5.7Hz, 1H), 7.36(d, *J*=3.3Hz, 1H), 7.17-7.33(m, 5H), 4.70(s, 2H), 3.64(s, 3H), 3.43(q, *J*=6.6Hz, 2H), 2.36(t, *J*=6.9Hz, 2H), 1.61-1.78(m, 4H). <sup>13</sup>C NMR(75 MHz, CDCl<sub>3</sub>): δ 174.0, 162.3, 160.9, 157.5, 148.5, 144.2, 143.3, 139.8, 129.1, 129.0, 127.2, 121.4, 51.8, 39.0, 33.8, 33.6, 29.5, 22.5. MS (ESI) *m/z*: 416.1 (M+H<sup>+</sup>).

**26n:** (colorless oil, 54.5%). <sup>1</sup>H NMR(300 MHz, CDCl<sub>3</sub>): δ 7.73(d, *J*=3.0Hz, 1H), 7.53(t,

$J=5.4\text{Hz}$ , 1H), 7.31(d,  $J=3.0\text{Hz}$ , 1H), 7.19-7.21(m, 5H), 4.43(s, 2H), 3.66(t,  $J=4.5\text{Hz}$ , 2H), 3.62(t,  $J=4.8\text{Hz}$ , 2H), 3.54(s, 3H), 3.31(q,  $J=6.3\text{Hz}$ , 2H), 2.25(t,  $J=6.6\text{Hz}$ , 2H), 1.53-1.60(m, 4H).  $^{13}\text{C}$  NMR(75 MHz,  $\text{CDCl}_3$ ):  $\delta$  173.5, 161.8, 160.6, 157.2, 144.5, 143.8, 143.6, 137.8, 128.1, 127.4, 127.3, 121.0, 72.7, 69.3, 51.3, 38.5, 33.3, 29.0, 27.7, 22.0. MS (ESI)  $m/z$ : 460.1 ( $\text{M}+\text{H}^+$ ).

**26o**: (colorless oil, 73.7%).  $^1\text{H}$  NMR(300 MHz,  $\text{CDCl}_3$ ):  $\delta$  7.76(d,  $J=3.3\text{Hz}$ , 1H), 7.53(s, 1H), 7.36(d,  $J=3.3\text{Hz}$ , 1H), 3.56(s, 3H), 3.35(q,  $J=6.3\text{Hz}$ , 2H), 2.27(t,  $J=6.6\text{Hz}$ , 2H), 1.91(s, 6H), 1.60-1.66(m, 4H).  $^{13}\text{C}$  NMR(75 MHz,  $\text{CDCl}_3$ ):  $\delta$  173.7, 162.1, 160.8, 155.8, 143.9, 142.6, 142.4, 141.6, 121.2, 116.4, 51.4, 38.8, 33.5, 29.2, 28.1, 22.3, 20.7. MS (ESI)  $m/z$ : 402.1 ( $\text{M}+\text{Na}^+$ ).

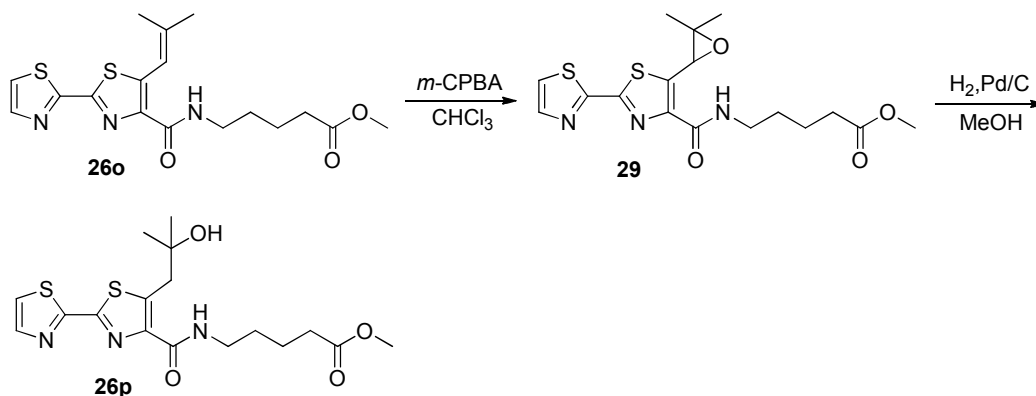

#### Preparation procedure for **26p**

To a solution of **26o** (288mg, 0.76mmol) in  $\text{CHCl}_3$  (25mL) was added *m*-CPBA (262mg, 1.52mmol). The reaction mixture was stirred for 3h at room temperature and then washed with saturated  $\text{NaHCO}_3$ , saturated  $\text{NaHSO}_3$  and brine. The mixture was dried over anhydrous  $\text{Na}_2\text{SO}_4$  and concentrated under reduced pressure to afford crude product **28**. To a solution of **28** in MeOH (50mL) was added Pd-C (10mg, 10%) and the reaction mixture was stirred under a  $\text{H}_2$  atmosphere for 5h at room temperature. The reaction mixture was then filtered and the filtrate was concentrated under reduced pressure. The obtained residue was purified by silica gel column chromatography (petroleum ether/EtOAc, 2/1) to afford **26p** as a colorless oil (202mg, 67% over two steps).  $^1\text{H}$  NMR(300 MHz,  $\text{CDCl}_3$ ):  $\delta$  7.83(d,  $J=3.3\text{Hz}$ , 1H), 7.62(t,  $J=5.4\text{Hz}$ , 1H), 7.42(d,  $J=3.3\text{Hz}$ , 1H), 3.62(s, 3H), 3.45(s, 2H), 3.40(q,  $J=6.6\text{Hz}$ , 2H), 2.33(t,  $J=6.6\text{Hz}$ , 2H), 1.65-1.67(m, 4H), 1.27(s, 6H).  $^{13}\text{C}$  NMR(75 MHz,  $\text{CDCl}_3$ ):  $\delta$  173.5, 162.8, 160.3, 157.3, 144.6, 143.7, 142.5, 121.0, 70.3, 51.2, 39.4, 38.7, 33.2, 29.3, 28.7, 21.9. MS (ESI)  $m/z$ : 398.1 ( $\text{M}+\text{H}^+$ ).

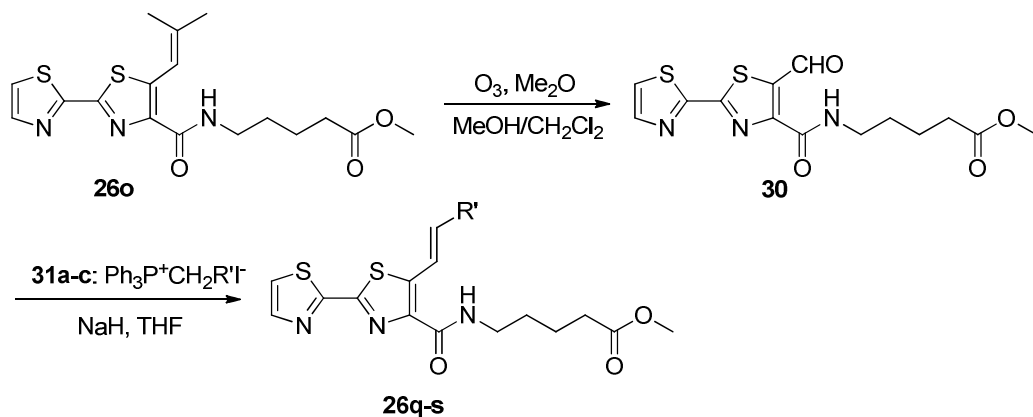

### Preparation procedure for 26q-s

Dry  $\text{O}_3$  was bubbled at a moderate rate into a solution of **26o** (900mg, 2.37mmol) in  $\text{CH}_2\text{Cl}_2/\text{MeOH}$  (5:1, v/v, 48mL) at  $-78^\circ\text{C}$  until TLC analysis indicated that **26o** was completely consumed. Dimethyl sulfide (0.3mL) was then added and the resulting reaction mixture was stirred at room temperature for additional 1h. Solvents were removed under reduced pressure and the obtained residue was purified by silica gel column chromatography (petroleum ether/EtOAc, 3/1 to 1/1) to afford aldehyde **30** as a pale yellow solid (830mg, 99.3%).  $^1\text{H NMR}$  (300 MHz,  $\text{CDCl}_3$ ):  $\delta$  10.9(s, 1H), 7.98(d,  $J=3.0\text{Hz}$ , 1H), 7.60(d,  $J=3.0\text{Hz}$ , 1H), 3.67(s, 3H), 3.52(q,  $J=6.3\text{Hz}$ , 2H), 2.38(t,  $J=6.6\text{Hz}$ , 2H), 1.72-1.76(m, 4H).  $^{13}\text{C NMR}$  (75 MHz,  $\text{CDCl}_3$ ):  $\delta$  185.4, 173.4, 164.3, 159.7, 158.9, 151.3, 144.6, 141.4, 123.3, 51.2, 38.8, 33.1, 28.6, 21.8. MS (ESI)  $m/z$ : 354.1 ( $\text{M}+\text{H}^+$ ).

**31a** (271mg, 0.65mmol) was added to a suspension of NaH (22mg, 0.59mmol) in dry THF (10mL) at  $0^\circ\text{C}$ . After one hour, a solution of **30** in dry THF (10mL) was added to reaction mixture. The resulting mixture was stirred for 12h at room temperature and the reaction was quenched with saturated  $\text{NH}_4\text{Cl}$  solution. The obtained mixture was extracted with  $\text{Et}_2\text{O}$  and the combined organic phase was washed with brine and dried over anhydrous  $\text{Na}_2\text{SO}_4$ . The solvents were removed under reduced pressure and the obtained residue was purified by silica gel column chromatography (petroleum ether/EtOAc, 3/1 to 2/1) to afford **26q** as a pale yellow oil (62mg, 52.1%).  $^1\text{H NMR}$  (300 MHz,  $\text{CDCl}_3$ ):  $\delta$  7.82(d,  $J=3.0\text{Hz}$ , 1H), 7.41(d,  $J=3.0\text{Hz}$ , 1H), 6.18-6.29(m, 1H), 6.00-6.09(m, 1H), 3.62(s, 3H), 3.41(q,  $J=6.3\text{Hz}$ , 2H), 2.33(t,  $J=6.6\text{Hz}$ , 2H), 1.89(d,  $J=6.6\text{Hz}$ , 3H), 1.40-1.67(m, 4H).  $^{13}\text{C NMR}$  (75 MHz,  $\text{CDCl}_3$ ):  $\delta$  174.1, 162.2, 160.9, 155.8, 144.3, 141.9, 134.8, 132.0, 122.5, 121.6, 51.8, 39.0, 33.8, 29.4, 22.5, 19.2. MS (ESI)  $m/z$ : 366.1 ( $\text{M}+\text{H}^+$ ).

Following similar preparation procedure, **26r** was obtained as a pale yellow oil (69.1%).  $^1\text{H NMR}$  (300 MHz,  $\text{CDCl}_3$ ):  $\delta$  7.93(d,  $J=3.0\text{Hz}$ , 1H), 7.84(d,  $J=3.0\text{Hz}$ , 1H), 7.45(dd,  $J=17.7, 9.9\text{Hz}$ , 1H), 5.69(d,  $J=17.7\text{Hz}$ , 1H), 5.44(d,  $J=9.9\text{Hz}$ , 1H), 3.62(s, 3H), 3.41(q,  $J=6.6\text{Hz}$ , 2H), 2.34(t,  $J=6.9\text{Hz}$ , 2H), 1.60-1.66(m, 4H).  $^{13}\text{C NMR}$  (75 MHz,  $\text{CDCl}_3$ ):  $\delta$  174.1, 161.9, 160.7, 157.0, 144.4, 144.1, 143.5, 127.9, 122.0, 121.1, 51.8, 39.1, 33.8, 29.4, 22.5. MS (ESI)  $m/z$ : 274.1 ( $\text{M}+\text{Na}^+$ ).

Following similar preparation procedure, **26s** was obtained as a pale yellow oil: (60.7%).  $^1\text{H NMR}$  (300 MHz,  $\text{CDCl}_3$ ):  $\delta$  8.82(d,  $J=3.0\text{Hz}$ , 1H), 7.64(d,  $J=15.9\text{Hz}$ , 1H), 7.48(t,  $J=5.1\text{Hz}$ , 1H), 7.40(d,  $J=3.0\text{Hz}$ , 1H), 6.20(dd,  $J=15.9, 6.6\text{Hz}$ , 1H), 3.61(s, 3H),

3.40(q,  $J=5.7\text{Hz}$ , 2H), 2.44-2.48(m, 1H), 2.32(t,  $J=5.4\text{Hz}$ , 2H), 1.61-1.70(m, 4H), 1.05(d,  $J=6.6\text{Hz}$ , 6H).  $^{13}\text{C}$  NMR(75 MHz,  $\text{CDCl}_3$ ):  $\delta$  174.0, 162.2, 160.9, 155.9, 146.6, 145.0, 144.3, 142.2, 121.6, 118.6, 51.8, 39.0, 33.8, 32.1, 29.4, 22.5, 22.1. MS (ESI)  $m/z$ : 394.1 ( $\text{M}+\text{H}^+$ ).

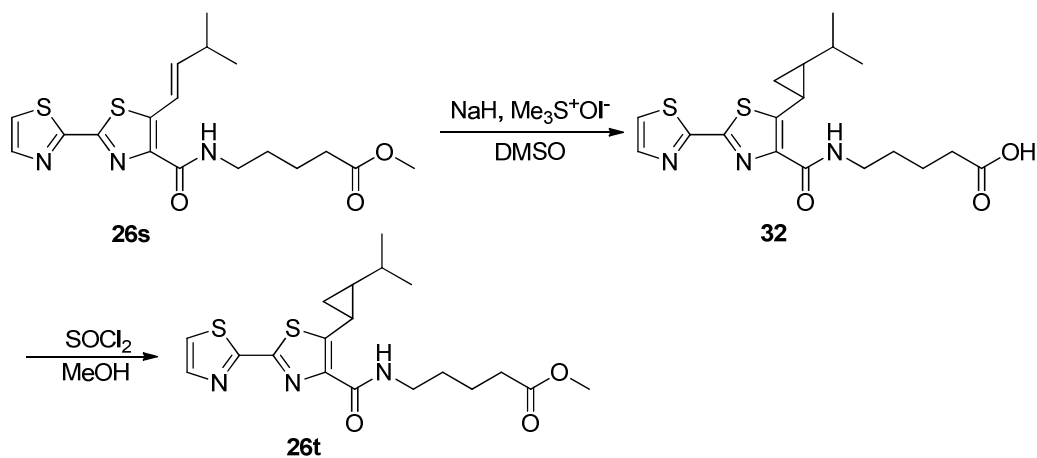

#### Preparation procedure for 26t

To a suspension of trimethylsulfoxonium iodide(403mg, 1.83mmol) in DMSO (5mL) at room temperature was added NaH (77mg,60%, 1.92mmol).After 30min, a solution of **26s**(180mg, 0.457mmol) in DMSO (2mL) was added and the resulting reaction mixture was stirred for 12hat room temperature before it was quenched with  $\text{H}_2\text{O}$ . The obtained mixture was acidified with 1N HCl and extracted with EtOAc.Thecombined organic phase was washed with brine, dried over anhydrous  $\text{Na}_2\text{SO}_4$  and concentrated under reduced pressure. The obtained residue was purified by silica gel column chromatography( $\text{CHCl}_3/\text{MeOH}$ , 20/1) to afford**32** as a colorless oil (160mg, 88.9%). $^1\text{H}$  NMR(300 MHz,  $\text{CDCl}_3$ ):  $\delta$  7.77(d,  $J=3.3\text{Hz}$ , 1H), 7.41(t,  $J=6.6\text{Hz}$ , 1H), 7.38(d,  $J=3.3\text{Hz}$ , 1H), 3.39(q,  $J=6.3\text{Hz}$ , 2H), 3.18-3.23(m, 1H), 2.31(t,  $J=6.0\text{Hz}$ , 2H), 1.65-1.67(m, 4H), 1.08-1.18(m, 2H), 0.98(d,  $J=6.6\text{Hz}$ , 3H), 0.95(d,  $J=6.6\text{Hz}$ , 3H), 0.82-0.90(m, 2H). $^{13}\text{C}$  NMR(75 MHz,  $\text{CDCl}_3$ ):  $\delta$  176.4, 162.5, 161.1, 154.8, 154.2, 144.0, 143.6, 121.2, 39.0, 37.4, 33.9, 33.4, 29.5, 22.5, 22.2, 21.8, 20.6, 16.9. MS (ESI)  $m/z$ : 416.1 ( $\text{M}+\text{Na}^+$ ).

To a solution of **32**(160mg, 0.407mmol) in MeOH (20mL) was added  $\text{SOCl}_2$  (97mg, 0.82mmol) and the resulting mixture was stirred for 12h at room temperature.The reaction mixture was then concentrated under reduced pressure to afford**26t**as a colorless oil (164mg, 99.4%). $^1\text{H}$  NMR(300 MHz,  $\text{CD}_3\text{OD}$ ):  $\delta$  7.86(d,  $J=3.3\text{Hz}$ , 1H), 7.71(d,  $J=3.3\text{Hz}$ , 1H), 3.64(s, 3H), 3.39(q,  $J=6.3\text{Hz}$ , 2H), 3.16-3.21(m, 1H), 2.38(t,  $J=6.0\text{Hz}$ , 2H), 1.65-1.67(m, 4H), 1.17-1.25(m, 2H), 1.03(d,  $J=6.6\text{Hz}$ , 6H), 0.90-0.97(m, 2H). $^{13}\text{C}$  NMR(75 MHz,  $\text{CDCl}_3$ ):  $\delta$  173.9, 161.9, 161.7, 157.5, 150.0, 144.0, 141.4, 123.7, 51.9, 39.0, 38.2, 33.7, 33.2, 29.3, 22.4, 22.1, 21.6, 21.4, 17.0. MS (ESI)  $m/z$ : 408.1 ( $\text{M}+\text{H}^+$ ).

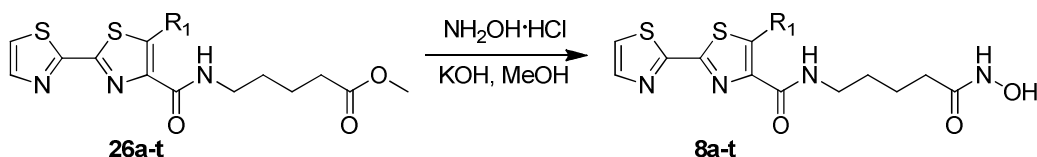

### Preparation procedure for 8a-t

Compound **8a-t** was prepared following the preparation procedure of compound **6a**.

**8a**: (pale yellow solid, 88.2%).  $^1\text{H}$  NMR(300 MHz, DMSO- $d_6$ ):  $\delta$  10.36(s, 1H), 8.68(s, 1H), 8.36(t,  $J=5.7\text{Hz}$ , 1H), 7.99(d,  $J=3.0\text{Hz}$ , 1H), 7.96(d,  $J=3.0\text{Hz}$ , 1H), 3.25(q,  $J=5.7\text{Hz}$ , 2H), 3.20(d,  $J=7.2\text{Hz}$ , 2H), 1.96(t,  $J=5.4\text{Hz}$ , 2H), 1.90-1.92(m, 1H), 1.51(m, 4H), 0.91(d,  $J=6.6\text{Hz}$ , 6H).  $^{13}\text{C}$  NMR(75 MHz, DMSO- $d_6$ ):  $\delta$  169.0, 161.3, 160.0, 156.3, 145.6, 144.7, 144.1, 123.2, 38.7, 34.8, 32.1, 30.6, 29.0, 22.8, 22.0. HRMS (ESI) ( $m/z$ ): Calcd for  $\text{C}_{16}\text{H}_{22}\text{N}_4\text{O}_3\text{S}_2\text{Na}^+$ , 405.1026(M+Na $^+$ ), Found 405.1076.

**8b**: (pale yellow solid, 50.0%).  $^1\text{H}$  NMR(300 MHz,  $\text{CD}_3\text{OD}$ ):  $\delta$  8.38(t,  $J=5.4\text{Hz}$ , 1H), 7.90(d,  $J=3.3\text{Hz}$ , 1H), 7.74(d,  $J=3.3\text{Hz}$ , 1H), 3.39(q,  $J=6.3\text{Hz}$ , 2H), 2.83(s, 3H), 2.16(t,  $J=6.9\text{Hz}$ , 2H), 1.67-1.69(m, 4H).  $^{13}\text{C}$  NMR(75 MHz, DMSO- $d_6$ ):  $\delta$  169.1, 161.4, 160.0, 155.9, 144.3, 144.1, 141.7, 123.2, 38.4, 32.1, 29.0, 22.8, 12.6. HRMS (ESI) ( $m/z$ ): Calcd for  $\text{C}_{13}\text{H}_{16}\text{N}_4\text{O}_3\text{S}_2\text{Na}^+$ , 363.0556 (M+Na $^+$ ), Found 363.0556.

**8c**: (pale yellow solid, 53.6%).  $^1\text{H}$  NMR(300 MHz,  $\text{CD}_3\text{OD}$ ):  $\delta$  8.33(t,  $J=5.4\text{Hz}$ , 1H), 7.89(d,  $J=3.3\text{Hz}$ , 1H), 7.73(d,  $J=3.3\text{Hz}$ , 1H), 3.37(q,  $J=6.6\text{Hz}$ , 2H), 3.31(q,  $J=6.9\text{Hz}$ , 2H), 2.16(t,  $J=6.3\text{Hz}$ , 2H), 1.64-1.67(m, 4H), 1.35(t,  $J=6.9\text{Hz}$ , 3H).  $^{13}\text{C}$  NMR(75 MHz,  $\text{CD}_3\text{OD}$ ):  $\delta$  172.8, 164.1, 162.2, 157.8, 151.9, 145.1, 144.5, 123.3, 39.9, 33.5, 30.3, 24.3, 22.1, 16.6. HRMS (ESI) ( $m/z$ ): Calcd for  $\text{C}_{14}\text{H}_{18}\text{N}_4\text{O}_3\text{S}_2\text{Na}^+$ , 377.0713(M+Na $^+$ ), Found 377.0716.

**8d**: (white solid, 65.0%).  $^1\text{H}$  NMR(300 MHz,  $\text{CD}_3\text{OD}$ ):  $\delta$  8.35(t,  $J=5.4\text{Hz}$ , 1H), 7.90(d,  $J=3.3\text{Hz}$ , 1H), 7.74(d,  $J=3.3\text{Hz}$ , 1H), 4.32-4.36(m, 1H), 3.41(q,  $J=6.3\text{Hz}$ , 2H), 2.16(t,  $J=6.3\text{Hz}$ , 2H), 1.67-1.69(m, 4H), 1.37(d,  $J=6.9\text{Hz}$ , 6H).  $^{13}\text{C}$  NMR(75 MHz,  $\text{CD}_3\text{OD}$ ):  $\delta$  172.8, 164.1, 162.3, 158.0, 157.8, 145.1, 144.1, 123.4, 39.9, 35.5, 30.3, 29.1, 25.6, 24.3. HRMS (ESI) ( $m/z$ ): Calcd for  $\text{C}_{15}\text{H}_{20}\text{N}_4\text{O}_3\text{S}_2\text{Na}^+$ , 391.0869(M+Na $^+$ ), Found 391.0877.

**8e**: (white solid, 67.1%).  $^1\text{H}$  NMR(300 MHz,  $\text{CD}_3\text{OD}$ ):  $\delta$  8.38(t,  $J=5.4\text{Hz}$ , 1H), 7.92(d,  $J=3.3\text{Hz}$ , 1H), 7.76(d,  $J=3.3\text{Hz}$ , 1H), 3.40(q,  $J=6.0\text{Hz}$ , 2H), 3.34(t,  $J=6.0\text{Hz}$ , 2H), 2.19(t,  $J=6.6\text{Hz}$ , 2H), 1.72-1.79(m, 6H), 1.41-1.54(m, 2H), 1.01(t,  $J=7.5\text{Hz}$ , 3H).  $^{13}\text{C}$  NMR(75 MHz,  $\text{CD}_3\text{OD}$ ):  $\delta$  172.8, 164.1, 162.2, 157.9, 150.3, 145.1, 144.8, 123.4, 40.0, 35.2, 33.5, 30.3, 28.0, 24.3, 23.6, 14.3. HRMS (ESI) ( $m/z$ ): Calcd for  $\text{C}_{16}\text{H}_{22}\text{N}_4\text{O}_3\text{S}_2\text{Na}^+$ , 405.1026(M+Na $^+$ ), Found 405.1035.

**8f**: (pale yellow solid, 68.3%).  $^1\text{H}$  NMR(300 MHz,  $\text{CD}_3\text{OD}$ ):  $\delta$  8.36(t,  $J=5.4\text{Hz}$ , 1H), 7.88(d,  $J=3.0\text{Hz}$ , 1H), 7.74(d,  $J=3.0\text{Hz}$ , 1H), 3.41(q,  $J=6.6\text{Hz}$ , 2H), 3.31-3.36(m, 1H), 2.16(t,  $J=6.6\text{Hz}$ , 2H), 1.64-1.69(m, 4H), 1.29-1.34(m, 2H), 0.82-0.86(m, 2H).  $^{13}\text{C}$  NMR(75 MHz,  $\text{CD}_3\text{OD}$ ):  $\delta$  172.8, 164.3, 162.0, 156.0, 155.2, 145.6, 145.0, 123.3, 39.9, 33.5, 30.3, 24.3, 14.3, 11.2. HRMS (ESI) ( $m/z$ ): Calcd for  $\text{C}_{15}\text{H}_{18}\text{N}_4\text{O}_3\text{S}_2\text{Na}^+$ , 389.0713(M+Na $^+$ ), Found 389.0736.

**8g**: (white solid, 33.3%).  $^1\text{H}$  NMR(300 MHz,  $\text{CD}_3\text{OD}$ ):  $\delta$  7.90(d,  $J=3.3\text{Hz}$ , 1H), 7.74(d,  $J=3.3\text{Hz}$ , 1H), 3.93-4.01(m, 1H), 3.40(t,  $J=6.6\text{Hz}$ , 2H), 2.16(t,  $J=7.2\text{Hz}$ , 2H), 1.77-1.89(m, 2H), 1.66-1.69(m, 6H), 1.29-1.57(m, 6H).  $^{13}\text{C}$  NMR(75 MHz, DMSO- $d_6$ ):  $\delta$  169.0, 161.2, 160.0, 155.9, 153.6, 144.1, 143.1, 123.1, 38.4, 36.3, 35.2, 32.0, 29.0, 26.0, 25.2, 22.7. HRMS (ESI) ( $m/z$ ): Calcd for  $\text{C}_{18}\text{H}_{24}\text{N}_4\text{O}_3\text{S}_2\text{Na}^+$ , 431.1182(M+Na $^+$ ), Found 431.1182.

**8h**: (white solid, 49.5%).  $^1\text{H}$  NMR(300 MHz,  $\text{CD}_3\text{OD}$ ):  $\delta$  8.48(t,  $J=5.4\text{Hz}$ , 1H), 7.93(d,  $J=3.0\text{Hz}$ , 1H), 7.89(s, 1H), 7.77(d,  $J=3.0\text{Hz}$ , 1H), 7.59(d,  $J=6.6\text{Hz}$ , 2H), 7.42-7.44(m, 3H), 3.41(q,  $J=6.0\text{Hz}$ , 2H), 2.12(t,  $J=6.6\text{Hz}$ , 2H), 1.62-1.64(m, 4H).  $^{13}\text{C}$  NMR(75 MHz, DMSO- $d_6$ ):  $\delta$  169.2, 161.7, 159.8, 158.0, 145.0, 144.4, 141.4, 129.7, 129.6, 129.3,

128.6, 123.7, 38.7, 32.8, 28.7, 22.8. HRMS (ESI) ( $m/z$ ):Calcd for  $C_{18}H_{18}N_4O_3S_2Na^+$ ,425.0713(M+Na<sup>+</sup>),Found425.0710.

**8i:** (pale yellow solid, 60.0%).<sup>1</sup>H NMR(300 MHz, CD<sub>3</sub>OD):  $\delta$  8.51(t,  $J=5.4$ Hz, 1H), 7.93(d,  $J=3.0$ Hz, 1H), 7.89(s, 1H), 7.78(d,  $J=3.0$ Hz, 1H), 7.62(t,  $J=5.1$ Hz, 2H), 7.17(t,  $J=8.4$ Hz, 2H), 3.33(q,  $J=8.4$ Hz, 2H), 2.13(t,  $J=6.3$ Hz, 2H), 1.63-1.65(m, 4H).<sup>13</sup>C NMR(75 MHz, DMSO- $d_6$ ):  $\delta$  169.2, 161.4, 159.7, 157.9, 144.8, 144.4, 140.6, 132.0, 131.9, 123.7, 115.6, 115.3, 38.7, 32.1, 28.8, 22.8. HRMS (ESI) ( $m/z$ ):Calcd for  $C_{18}H_{17}FN_4O_3S_2Na^+$ ,443.0618(M+Na<sup>+</sup>),Found443.0622.

**8j:** (pale yellow solid, 45.9%).<sup>1</sup>H NMR(300 MHz, CD<sub>3</sub>OD):  $\delta$  8.52(t,  $J=5.4$ Hz, 1H), 7.95(d,  $J=3.3$ Hz, 1H), 7.82(d,  $J=3.3$ Hz, 1H), 7.53(t,  $J=8.7$ Hz, 1H), 7.37(d,  $J=8.7$ Hz, 1H), 7.18(t,  $J=8.1$ Hz, 1H), 3.34(q,  $J=6.6$ Hz, 2H), 2.12(t,  $J=6.6$ Hz, 2H), 1.62-1.64(m, 4H).<sup>13</sup>C NMR(75 MHz, CD<sub>3</sub>OD):  $\delta$  172.8, 166.2, 162.9, 161.6, 161.3, 147.2, 145.4, 140.5, 136.4, 134.6, 127.3, 124.1, 118.2, 115.2, 40.0, 33.4, 30.1, 24.2. HRMS (ESI) ( $m/z$ ):Calcd for  $C_{18}H_{16}ClFN_4O_3S_2Na^+$ ,477.0229(M+Na<sup>+</sup>),Found477.0233.

**8k:** (pale yellow solid, 46.0%).<sup>1</sup>H NMR(300 MHz, CD<sub>3</sub>OD):  $\delta$  8.47(t,  $J=5.4$ Hz, 1H), 7.94(d,  $J=3.0$ Hz, 1H), 7.79(d,  $J=3.0$ Hz, 1H), 7.50(t,  $J=7.8$ Hz, 2H), 7.39(t,  $J=7.8$ Hz, 2H), 3.31(q,  $J=6.6$ Hz, 2H), 1.99(t,  $J=5.4$ Hz, 2H), 1.17-1.19(m, 4H).<sup>13</sup>C NMR(75 MHz, CD<sub>3</sub>OD):  $\delta$  172.8, 163.1, 161.6, 161.0, 147.0, 145.4, 141.5, 135.2, 133.2, 131.9, 130.8, 130.7, 128.0, 124.1, 40.1, 33.4, 30.1, 24.1. HRMS (ESI) ( $m/z$ ):Calcd for  $C_{18}H_{17}ClN_4O_3S_2Na^+$ ,459.0328(M+Na<sup>+</sup>),Found459.0323.

**8l:** (pale yellow solid, 76.1%).<sup>1</sup>H NMR(300 MHz, CD<sub>3</sub>OD):  $\delta$  8.22(d,  $J=7.2$ Hz, 2H), 7.90(d,  $J=3.0$ Hz, 1H), 7.79(d,  $J=6.9$ Hz, 2H), 7.58(t,  $J=6.0$ Hz, 1H), 7.53(d,  $J=3.0$ Hz, 1H), 3.40(q,  $J=6.6$ Hz, 2H), 2.34(t,  $J=6.9$ Hz, 2H), 1.59-1.74(m, 4H).<sup>13</sup>C NMR(75 MHz, CD<sub>3</sub>OD):  $\delta$  172.8, 166.0, 163.6, 159.3, 145.5, 145.3, 142.9, 138.8, 131.3, 130.6, 124.3, 123.9, 40.2, 33.5, 30.0, 24.2. HRMS (ESI) ( $m/z$ ):Calcd for  $C_{18}H_{17}N_5O_5S_2Na^+$ ,470.0563 (M+Na<sup>+</sup>),Found470.0562.

**8m:** (white solid, 47.3%).<sup>1</sup>H NMR(300 MHz, CD<sub>3</sub>OD):  $\delta$  8.43(t,  $J=5.4$ Hz, 1H), 7.86(d,  $J=3.0$ Hz, 1H), 7.73(d,  $J=3.0$ Hz, 1H), 7.23-7.34(m, 5H), 4.70(s, 2H), 3.44(q,  $J=6.3$ Hz, 2H), 2.17(t,  $J=6.6$ Hz, 2H), 1.65-1.69(m, 4H).<sup>13</sup>C NMR(75 MHz, DMSO- $d_6$ ):  $\delta$  169.2, 161.4, 159.9, 157.0, 146.6, 144.2, 143.8, 139.9, 128.7, 128.6, 126.9, 123.3, 38.5, 32.3, 32.2, 29.1, 22.9. HRMS (ESI) ( $m/z$ ):Calcd for  $C_{19}H_{20}N_4O_3S_2Na^+$ ,439.0869(M+Na<sup>+</sup>),Found439.0871.

**8n:** (white solid, 73.1%).<sup>1</sup>H NMR(300 MHz, CD<sub>3</sub>OD):  $\delta$  7.87(d,  $J=3.0$ Hz, 1H), 7.70(d,  $J=3.0$ Hz, 1H), 7.23-7.30(m, 5H), 4.52(s, 2H), 3.75(t,  $J=5.7$ Hz, 2H), 3.61(t,  $J=5.7$ Hz, 2H), 3.36(q,  $J=6.3$ Hz, 2H), 2.14(t,  $J=6.3$ Hz, 2H), 1.64-1.68(m, 4H).<sup>13</sup>C NMR(75 MHz, CD<sub>3</sub>OD):  $\delta$  171.5, 162.9, 161.0, 157.7, 144.9, 144.1, 143.8, 138.2, 128.2, 127.7, 127.5, 122.1, 72.8, 69.4, 38.6, 32.2, 28.9, 27.6, 23.0. HRMS (ESI) ( $m/z$ ):Calcd for  $C_{21}H_{24}N_4O_4S_2Na^+$ ,483.1131(M+Na<sup>+</sup>),Found483.1134.

**8o:** (pale yellow solid, 44.0%).<sup>1</sup>H NMR(300 MHz, CD<sub>3</sub>OD):  $\delta$  8.33(t,  $J=5.4$ Hz, 1H), 7.87(d,  $J=3.3$ Hz, 1H), 7.72(s, 1H), 7.42(d,  $J=3.3$ Hz, 1H), 3.38(q,  $J=6.6$ Hz, 2H), 2.16(t,  $J=6.9$ Hz, 2H), 1.99(s, 6H), 1.62-1.68(m, 4H).<sup>13</sup>C NMR(75 MHz, CD<sub>3</sub>OD):  $\delta$  172.8, 164.4, 162.1, 157.5, 145.2, 144.4, 143.8, 142.8, 123.5, 117.3, 40.1, 33.5, 30.3, 28.3, 24.3, 21.1. HRMS (ESI) ( $m/z$ ):Calcd for  $C_{16}H_{20}N_4O_3S_2Na^+$ ,403.0869(M+Na<sup>+</sup>),Found403.0879.

**8p:** (white solid, 30.0%).<sup>1</sup>H NMR (300 MHz, CD<sub>3</sub>OD):  $\delta$  8.47(t,  $J=5.4$ Hz, 1H), 7.90(d,

$J=3.0\text{Hz}$ , 1H), 7.74(d,  $J=3.0\text{Hz}$ , 1H), 3.58(s, 2H), 3.40(q,  $J=6.0\text{Hz}$ , 2H), 2.16(t,  $J=6.3\text{Hz}$ , 2H), 1.61-1.67(m, 4H), 1.26(s, 6H).  $^{13}\text{C}$ NMR(75 MHz, DMSO- $d_6$ ):  $\delta$  169.0, 161.8, 160.4, 157.5, 145.3, 144.2, 142.2, 123.0, 68.9, 38.7, 38.4, 32.1, 29.0, 28.9, 22.8. HRMS (ESI) ( $m/z$ ):Calcd for  $\text{C}_{16}\text{H}_{22}\text{N}_4\text{O}_4\text{S}_2\text{Na}^+$ ,421.0975( $\text{M}+\text{Na}^+$ ),Found421.0980.

**8q**: (pale yellow solid, 42.9%).  $^1\text{H}$  NMR(300 MHz, DMSO- $d_6$ ):  $\delta$  10.37(s, 1H), 8.69(s, 1H), 8.42(t,  $J=5.4\text{Hz}$ , 1H), 8.00(s, 2H), 7.58(d,  $J=16.2\text{Hz}$ , 1H), 6.35(m, 1H), 3.27(m, 2H), 1.98(t,  $J=6.9\text{Hz}$ , 2H), 1.73(d,  $J=6.6\text{Hz}$ , 3H), 1.51(m, 4H).  $^{13}\text{C}$  NMR(75 MHz, DMSO- $d_6$ ):  $\delta$  169.1, 161.2, 159.7, 155.5, 144.3, 142.6, 134.5, 123.7, 121.8, 38.5, 32.1, 29.0, 22.8, 18.8. HRMS (ESI) ( $m/z$ ):Calcd for  $\text{C}_{15}\text{H}_{18}\text{N}_4\text{O}_3\text{S}_2\text{Na}^+$ ,389.0713( $\text{M}+\text{Na}^+$ ),Found389.0731.

**8r**: (pale yellow solid, 33.3%).  $^1\text{H}$  NMR(300 MHz, DMSO- $d_6$ ):  $\delta$  10.36(s, 1H), 8.69(s, 1H), 8.52(t,  $J=5.4\text{Hz}$ , 1H), 8.04(s, 2H), 7.83(dd,  $J=17.7,11.1\text{Hz}$ , 1H), 5.83(d,  $J=17.7\text{Hz}$ , 1H), 5.55(d,  $J=11.1\text{Hz}$ , 1H), 3.28(m, 2H), 1.98(t,  $J=6.9\text{Hz}$ , 2H), 1.51(m, 4H).  $^{13}\text{C}$  NMR(75 MHz, DMSO- $d_6$ ):  $\delta$  169.0, 161.0, 159.6, 156.7, 144.5, 144.3, 142.2, 127.3, 124.1, 121.4, 38.5, 32.1, 28.9, 22.8. HRMS (ESI) ( $m/z$ ):Calcd for  $\text{C}_{14}\text{H}_{16}\text{N}_4\text{O}_3\text{S}_2\text{Na}^+$ ,375.0556 ( $\text{M}+\text{Na}^+$ ),Found375.0556.

**8s**: (pale yellow solid, 88.0%).  $^1\text{H}$  NMR(300 MHz,  $\text{CD}_3\text{OD}$ ):  $\delta$  8.33(t,  $J=5.4\text{Hz}$ , 1H), 7.89(s, 2H), 7.73(s, 1H), 7.54(d,  $J=15.9\text{Hz}$ , 1H), 6.26-6.34(m, 1H), 3.39(q,  $J=5.7\text{Hz}$ , 2H), 2.48-2.50(m, 1H), 2.16(t,  $J=6.6\text{Hz}$ , 2H), 1.63-1.68(m, 4H), 1.11(d,  $J=6.6\text{Hz}$ , 6H).  $^{13}\text{C}$  NMR(75 MHz,  $\text{CD}_3\text{OD}$ ):  $\delta$  172.8, 164.1, 162.0, 157.3, 147.4, 145.8, 145.2, 143.6, 123.7, 119.5, 40.1, 33.5, 33.3, 30.3, 24.3, 22.3. HRMS (ESI) ( $m/z$ ):Calcd for  $\text{C}_{17}\text{H}_{22}\text{N}_4\text{O}_3\text{S}_2\text{Na}^+$ ,417.1026( $\text{M}+\text{Na}^+$ ),Found417.1004.

**8t**: (white solid, 63.0%).  $^1\text{H}$  NMR(300 MHz,  $\text{CD}_3\text{OD}$ ):  $\delta$  8.29(t,  $J=5.4\text{Hz}$ , 1H), 7.89(s, 1H), 7.85(d,  $J=3.3\text{Hz}$ , 1H), 7.70(d,  $J=3.3\text{Hz}$ , 1H), 3.31(q,  $J=6.3\text{Hz}$ , 2H), 3.15-3.17(m, 1H), 2.16(t,  $J=6.0\text{Hz}$ , 2H), 1.65-1.68(m, 4H), 1.16-1.22(m, 2H), 1.06(d,  $J=6.6\text{Hz}$ , 3H), 1.02(d,  $J=6.6\text{Hz}$ , 3H), 0.92-0.96(m, 2H).  $^{13}\text{C}$  NMR(75 MHz,  $\text{CD}_3\text{OD}$ ):  $\delta$  172.8, 164.5, 162.2, 155.7, 155.6, 145.0, 144.9, 123.3, 40.0, 38.3, 34.7, 33.5, 30.3, 24.3, 22.4, 22.0, 20.7, 17.8. HRMS (ESI) ( $m/z$ ):Calcd for  $\text{C}_{18}\text{H}_{24}\text{N}_4\text{O}_3\text{S}_2\text{Na}^+$ ,431.1182( $\text{M}+\text{Na}^+$ ),Found 431.1226.

## Biological Materials and Methods

### Animals

Female C57BL/6 mice were purchased from Shanghai Laboratory Animal Centre of Chinese Academy of Sciences and housed in specific pathogen-free conditions. All animal procedures and experiments were carried out according to National Institutes of Health Guide for Care and Use of Laboratory Animals and were approved by the Bioethics Committee of Shanghai Institute of Materia Medica.

### Reagents

Anti-mouse CD3 (145-2C11), anti-mouse CD28 (37.51) monoclonal antibodies were purchased from BD Pharmingen (San Diego, CA, USA). Phycoerythrin–cyanine 7–conjugated anti–mouse CD4 (RM4-5), allophycocyanin-conjugated anti–mouse CD8a (53-6.7), allophycocyanin-conjugated anti–mouse IFN- $\gamma$  (XMG1.2), phycoerythrin-conjugated anti–mouse IL-17 (eBio17B7), phycoerythrin-conjugated anti–mouse CD11c (N418) and anti–mouse CD45 (30-F11) were from eBiosciences (San Diego, CA, USA). Alexa Fluor 488 goat anti-rat IgG were from Invitrogen (Carlsbad, CA, USA). Complete Freund's adjuvant (CFA) was from Sigma-Aldrich



(St.Louis, MO). Ficoll-Paque<sup>TM</sup> PLUS was from GE healthcare. BD Cytotfix/Cytoperm<sup>TM</sup> kit was purchased from BD bioscience (FranklinLakes, NJ).

#### ***EAE induction and drug treatment***

Female C57BL/6 mice 8-9 weeks old were immunized subcutaneously with 200 µg MOG (35-55) (MEVGWYRSPFSRVVHLYRNGK, GL Biochem, Shanghai, China) in complete Freund's adjuvant containing heat-killed *Mycobacterium tuberculosis* (H37Ra strain; 5mg/ml; BD Diagnostics). Pertussis toxin (200 ng/mouse; Calbiochem) in PBS was administered intraperitoneally on day 0 and day 2. Mice were examined daily and were assigned scores on a scale of 0-5 as follows: 0, no symptoms; 1, tail weakness; 2, hind limb weakness; 3, paraplegia; 4, paraplegia with forelimb weakness or paralysis; 5, moribund or dead. For drug treatment, **8f** were given by oral administration (**8f** suspension on PVP K29/32 in PBS) twice daily from day 3 or day 15 post-immunization till the end of the study. PBS was given as a vehicle control.

#### ***Histology and Immunofluorescence***

For histological and immunofluorescent staining, mice were anesthetized and perfused with PBS (pH 7.4) followed by 4% (w/v) paraformaldehyde. Spinal cord samples were then fixed in 4% paraformaldehyde overnight. Paraffin-embedded spinal cord sections were stained with hematoxylin and eosin or with luxol fast blue for analysis of inflammation or demyelination, respectively. Frozen sections of spinal cord were stained with anti-mouse CD45 antibodies (30 - F11, eBioscience), then with Alexa Fluor 488 goat anti-rat IgG secondary antibodies.

#### ***Isolation and analysis of central nervous system leukocytes infiltrations***

Brain and spinal cord were collected from mice perfused with PBS and were homogenized in ice-cold tissue grinders and filtered through a 70 µm cell strainer. Mononuclear cells were prepared by Percoll gradient centrifugation (37/70%, GE Healthcare Biosciences, Piscataway, NJ).

#### ***Leukocytes apoptosis experiment***

Splenocytes were isolated from C57/BL6 mice and cultured in complete RPMI1640 medium in 48-well plates at a density of  $2 \times 10^6$ /well. Splenocytes were stimulated with anti-CD3 (2 µg/ml) and anti-CD28 (2 µg/ml) antibodies for T cells activation or LPS (20 µg/ml, Sigma) for B cells activation. After 48h live cells were purified through the Ficoll ( $\rho=1.084$ ) density gradient and restimulated with anti-mouse CD3 (2 µg/ml) or LPS (20 µg/ml) for 24h in the presence of various concentrations of **8f** (dissolved in DMSO). Cells were then stained with PI and Annexin V in combination with anti-CD4 or anti-CD8 or anti-B220 antibody. The percentage of apoptotic cells (Annexin V positive, PI negative) was determined by flow cytometry.

#### ***Intracellular staining and Flow cytometry***

Cells obtained from spleen, lymph nodes or CNS were incubated for 5 h at 37°C with phorbol 12-myristate 13-acetate (50ng/ml, Sigma), ionomycin (750ng/ml, Sigma) and brefeldin A (3 µg/ml, Sigma). For surface staining, cells were incubated with relevant fluorescence-labeled surface antibodies for 30 min at 4°C. After surface staining, cells were resuspended in Fixation/Permeabilization solution (Cytotfix/Cytoperm kit, BD Pharmingen) and intracellular cytokine staining was done

according to the manufacturer's protocol. Guava EasyCyte 8HT Flow Cytometry System (Millipore, Billerica, MA) were used for flow cytometry.

#### **Western Blot**

Mouse embryo fibroblasts (MEF) cells were washed once with PBS, and then lysed, sonicated and boiled at 100°C for 5 min in lysis buffer (50mM Tris-HCl, 2% w/v SDS, 10% glycerol, 1%  $\beta$ -mercaptoethanol, 0.01% bromophenyl blue (pH 6.8)). Samples were separated on SDS-PAGE and transferred to polyvinylidene difluoride membranes. The membranes were first incubated with blocking buffer (TBS with 0.05% Tween 20, 5% nonfat milk) for 1 h at room temperature and then incubated overnight at 4°C in buffer containing rabbit anti-GAPDH (1:10 000, CST), rabbit anti-histone H3 (1:1000, Millipore), rabbit anti-acetyl-histone H3 (1:50 000, Millipore), rabbit anti-histone H4 (1:1000, Millipore), rabbit anti-acetyl-histone H3 (1:4000, Millipore). The membranes were washed thrice and incubated with goat anti-rabbit IgG HRP (1:10000) for 1 h. After washing, immunostaining was visualized using Amersham ECL Plus Western Blotting detection reagents (GE Healthcare).

#### **Statistical analysis**

The statistical significance of the EAE clinical scores between treatments were analyzed with two-way ANOVA test. For other analysis, Student's t-test was applied for statistical comparison of two groups. A P value of 0.05 or less was considered significant.

#### **Enzymatic assay with recombinant human HDACs**

Eight full-length hHDACs (human HDAC1, 2, 3, 4, 6, 8, 10 and 11) cDNA were subcloned into the pFASTBAC1 vector and recombinant hHDACs protein were over expressed in insect High5 cells using the baculoviral expression system, and all His<sub>6</sub>-tagged proteins were purified using Ni-NTA (QIAGEN). The protein of HDAC5 was purchased from BPS Biosciences. The deacetylase activity were determined in a total 25  $\mu$ l assay reaction in black 384-well plates (OptiPlate<sup>TM</sup>-384F, PerkinElmer) containing 25mM Hepes pH 8.0, 137mM NaCl, 2.7mM KCl and 4.9mM MgCl<sub>2</sub>, with the HDAC substrate Ac-Lys-Tyr-Lys( $\epsilon$ -acetyl)-AMC for HDAC1, 2, 3, 4, 5, 8, 10 and 11, and another HDAC substrate Boc-Lys( $\epsilon$ -acetyl)-AMC for HDAC6. In brief, the HDAC inhibitory assay mixture contained HDAC substrate (10  $\mu$ M for HDAC1, 3, 4, 5 and 10, 5  $\mu$ M for HDAC8, 20  $\mu$ M for HDAC2 and 11, 50  $\mu$ M for HDAC6), rhHDAC isoforms (20-200nM) and varied concentration of inhibitor or SAHA as positive control. After the incubation The reaction mixture at room temperature of 24 hrs for HDAC1, 2, 3, 4, 5, 8, 10 and 11, or 3 hrs for HDAC6, the reaction mixture was quenched by addition of 25  $\mu$ l Trypsin solution (diluted to final concentration of 0.3125%), and incubated further for 30 min to allow the fluorescence signal to develop. The fluorescence generated was monitored at wavelengths 355nm (excitation) and 460nm (emission) by Envision (PerkinElmer) for the inhibitory activity calculation. All the multi-dose response of inhibition activity of each compound was carried out in triplicates, and the IC<sub>50</sub> value was calculated using the software GraphPad Prism 5 and chosen the equation "sigmoidal dose-response (variable slope)" for curve fitting.
